# Supplementary material for: Direct nucleophilic trifluoromethylation using fluoroform: a theoretical mechanistic investigation and insight into the effect of alkali metal cations
Source: Royal Society of Chemistry journal article supplement (doi:10.1039/c3nj00686g), 2013-01-01
Supplement: c3nj00686g.pdf [file c3nj00686g.pdf]

## Supporting Information

# Direct Nucleophilic Trifluoromethylation Using Fluoroform: A Theoretical Mechanistic Investigation and Insight into the Effect of Alkali Metal Cations

Gen Luo,<sup>[a,b]</sup> Yi Luo,<sup>\*[a,b]</sup> and Jingping Qu<sup>\*[a]</sup>

[a] *State Key Laboratory of Fine Chemicals, School of Pharmaceutical Science and Technology, Dalian University of Technology, Dalian 116024, China*

[b] *PSU-DUT Joint Center for Energy Research, Dalian University of Technology, Dalian 116024, China*

E-mail: [luoyi@dlut.edu.cn](mailto:luoyi@dlut.edu.cn)(Y.L.); [qujp@dlut.edu.cn](mailto:qujp@dlut.edu.cn)(J.Q.)

To be published in *New J. Chem.*

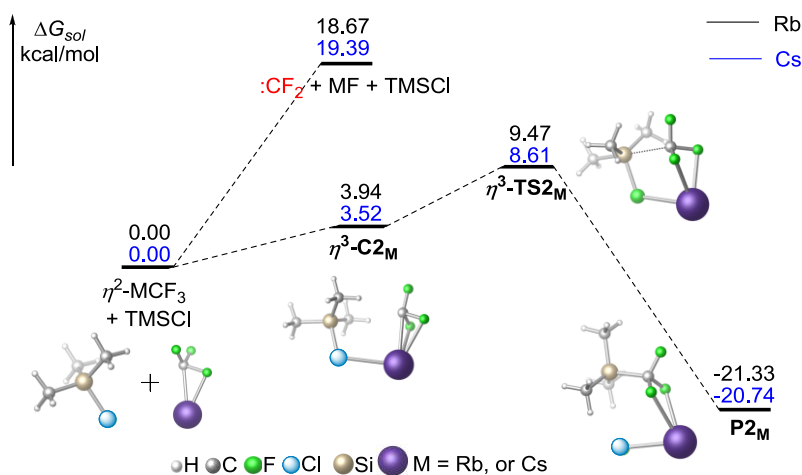

**Figure 1S.** Energy profile (energies in kcal/mol) for the processes of decomposition of  $\eta^2\text{-MCF}_3$  (M = Rb, Cs) and their trifluoromethylation with TMSCl.

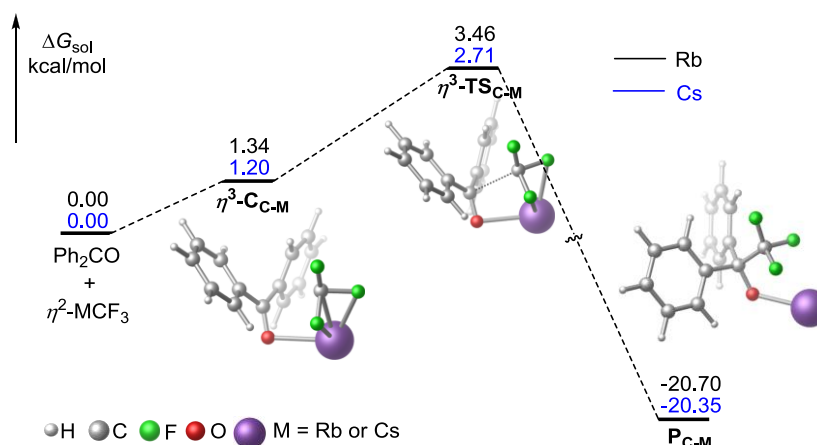

**Figure 2S.** Energy profile (energies in kcal/mol) for the trifluoromethylation of benzophenone with  $\eta^2$ -MCF<sub>3</sub> (M = Rb, Cs).

**Table 1S.** Orbital energies (a.u.) of HOMO and LUMO for M<sup>+</sup> (M = Li, Na, K, Rb, Cs)

|                 | $E_{\text{HOMO}}$ | $E_{\text{LUMO}}$ | $(E_{\text{LUMO}} - E_{\text{HOMO}})/2$ |
|-----------------|-------------------|-------------------|-----------------------------------------|
| Li <sup>+</sup> | -2.28230          | -0.09107          | 1.09562                                 |
| Na <sup>+</sup> | -1.39274          | -0.09445          | 0.64915                                 |
| K <sup>+</sup>  | -0.91133          | -0.08208          | 0.41463                                 |
| Rb <sup>+</sup> | -0.77688          | -0.08078          | 0.34805                                 |
| Cs <sup>+</sup> | -0.65791          | -0.07679          | 0.29056                                 |

**Table 2S.** Optimized Cartesian coordinates (Å) and total electronic energies (a.u.) of the stationary points as well as the imaginary frequency (cm<sup>-1</sup>) of TSs.

| Atoms                                      | x            | y            | z            |
|--------------------------------------------|--------------|--------------|--------------|
| <b>CF<sub>3</sub>H, -338.234874987</b>     |              |              |              |
| C                                          | -0.000099000 | -0.000215000 | 0.340675000  |
| H                                          | -0.000055000 | -0.000258000 | 1.429290000  |
| F                                          | 0.949850000  | -0.809348000 | -0.128665000 |
| F                                          | -1.176246000 | -0.417355000 | -0.128683000 |
| F                                          | 0.226468000  | 1.226875000  | -0.128579000 |
| <b>(TMS)<sub>2</sub>NK, -1473.19647054</b> |              |              |              |
| N                                          | 0.000025000  | 0.145152000  | -0.000750000 |

|    |              |              |              |
|----|--------------|--------------|--------------|
| Si | -1.560397000 | -0.477759000 | -0.000188000 |
| Si | 1.560403000  | -0.477891000 | 0.000025000  |
| C  | -2.007545000 | -1.518438000 | -1.516623000 |
| H  | -1.405596000 | -2.431912000 | -1.542123000 |
| H  | -3.061344000 | -1.814199000 | -1.518372000 |
| H  | -1.803879000 | -0.968604000 | -2.439938000 |
| C  | -2.008759000 | -1.513245000 | 1.519464000  |
| H  | -1.805466000 | -0.960531000 | 2.441146000  |
| H  | -3.062782000 | -1.808251000 | 1.521373000  |
| H  | -1.407481000 | -2.427056000 | 1.548404000  |
| C  | -2.784711000 | 0.995424000  | -0.002842000 |
| H  | -3.822498000 | 0.650294000  | -0.003156000 |
| H  | -2.670321000 | 1.623249000  | 0.890424000  |
| H  | -2.668864000 | 1.621011000  | -0.897472000 |
| C  | 2.008141000  | -1.518342000 | -1.516387000 |
| H  | 1.406649000  | -2.432094000 | -1.542296000 |
| H  | 1.804648000  | -0.968427000 | -2.439696000 |
| H  | 3.062090000  | -1.813598000 | -1.517774000 |
| C  | 2.007848000  | -1.513503000 | 1.519854000  |
| H  | 3.061987000  | -1.808038000 | 1.523147000  |
| H  | 1.802947000  | -0.961051000 | 2.441336000  |
| H  | 1.406914000  | -2.427580000 | 1.547775000  |
| C  | 2.784815000  | 0.995208000  | -0.002542000 |
| H  | 2.669827000  | 1.623708000  | 0.890172000  |
| H  | 3.822586000  | 0.650030000  | -0.001862000 |
| H  | 2.669626000  | 1.620131000  | -0.897722000 |
| K  | 0.000104000  | 2.622808000  | -0.000073000 |

**$\eta^2$ -C1<sub>K</sub>, -1811.45370913**

|    |              |              |              |
|----|--------------|--------------|--------------|
| N  | 0.549142000  | 0.000619000  | 0.076344000  |
| Si | 1.102853000  | -1.563486000 | -0.206558000 |
| Si | 1.099296000  | 1.566607000  | -0.203175000 |
| C  | 0.365058000  | -2.359278000 | -1.761415000 |
| H  | 0.604059000  | -1.764555000 | -2.648929000 |
| H  | 0.758034000  | -3.367684000 | -1.923444000 |
| H  | -0.724613000 | -2.442831000 | -1.695580000 |
| C  | 2.977242000  | -1.773336000 | -0.329362000 |
| H  | 3.481019000  | -1.352354000 | 0.545179000  |
| H  | 3.252467000  | -2.829864000 | -0.404626000 |
| H  | 3.373053000  | -1.263613000 | -1.212274000 |
| C  | 0.539112000  | -2.692117000 | 1.232474000  |
| H  | 0.879595000  | -3.720868000 | 1.084237000  |
| H  | 0.951682000  | -2.363499000 | 2.194838000  |
| H  | -0.554811000 | -2.740032000 | 1.306676000  |

|   |              |              |              |
|---|--------------|--------------|--------------|
| C | 0.357204000  | 2.365367000  | -1.754518000 |
| H | 0.595117000  | 1.773177000  | -2.644025000 |
| H | -0.732375000 | 2.448023000  | -1.686520000 |
| H | 0.749133000  | 3.374483000  | -1.914683000 |
| C | 2.973085000  | 1.779416000  | -0.330526000 |
| H | 3.247214000  | 2.836676000  | -0.399151000 |
| H | 3.480208000  | 1.352374000  | 0.539115000  |
| H | 3.366048000  | 1.276415000  | -1.218570000 |
| C | 0.537184000  | 2.690477000  | 1.239966000  |
| H | 0.953885000  | 2.360894000  | 2.200174000  |
| H | 0.874335000  | 3.720488000  | 1.092743000  |
| H | -0.556604000 | 2.735191000  | 1.317991000  |
| C | -2.289199000 | 0.000149000  | -0.790719000 |
| H | -1.327992000 | 0.001871000  | -1.297144000 |
| F | -2.395951000 | -1.077149000 | 0.018371000  |
| F | -2.398291000 | 1.074695000  | 0.021569000  |
| F | -3.338930000 | 0.000059000  | -1.603530000 |
| K | -0.889637000 | -0.006571000 | 2.158040000  |

**$\eta^3$ -TS1<sub>K</sub>, -1811.42939701, i972.6599**

|    |              |              |              |
|----|--------------|--------------|--------------|
| N  | 0.478598000  | 0.020440000  | -0.118769000 |
| Si | 1.232625000  | -1.520502000 | -0.197203000 |
| Si | 1.017907000  | 1.652780000  | -0.160754000 |
| C  | 0.813981000  | -2.386143000 | -1.810590000 |
| H  | 1.215291000  | -1.829709000 | -2.661797000 |
| H  | 1.219077000  | -3.401243000 | -1.845873000 |
| H  | -0.270383000 | -2.449826000 | -1.941044000 |
| C  | 3.100024000  | -1.507883000 | 0.035004000  |
| H  | 3.394477000  | -1.060032000 | 0.987763000  |
| H  | 3.472806000  | -2.536700000 | 0.022726000  |
| H  | 3.608998000  | -0.962516000 | -0.762853000 |
| C  | 0.537640000  | -2.625817000 | 1.190895000  |
| H  | 0.964042000  | -3.630963000 | 1.126925000  |
| H  | 0.786435000  | -2.250910000 | 2.191790000  |
| H  | -0.548462000 | -2.746477000 | 1.101228000  |
| C  | 0.296097000  | 2.531098000  | -1.656062000 |
| H  | 0.673225000  | 2.091630000  | -2.583371000 |
| H  | -0.793930000 | 2.438416000  | -1.666775000 |
| H  | 0.544225000  | 3.596284000  | -1.660017000 |
| C  | 2.885531000  | 1.876583000  | -0.147781000 |
| H  | 3.126814000  | 2.943798000  | -0.132209000 |
| H  | 3.354177000  | 1.414467000  | 0.724368000  |
| H  | 3.344414000  | 1.446963000  | -1.041506000 |
| C  | 0.344011000  | 2.569189000  | 1.367176000  |

|   |              |              |              |
|---|--------------|--------------|--------------|
| H | 0.701895000  | 2.132442000  | 2.307827000  |
| H | 0.667445000  | 3.613924000  | 1.368577000  |
| H | -0.752552000 | 2.588718000  | 1.362437000  |
| K | -1.182521000 | -0.126125000 | 2.002967000  |
| C | -2.090578000 | -0.095743000 | -0.828668000 |
| H | -0.652229000 | -0.039235000 | -0.683502000 |
| F | -2.936171000 | -0.094605000 | -1.864888000 |
| F | -2.487400000 | -1.209678000 | -0.056211000 |
| F | -2.550398000 | 0.957024000  | -0.004251000 |

**$\eta^3$ -P1<sub>K</sub>, -1811.43551162**

|    |              |              |              |
|----|--------------|--------------|--------------|
| N  | -0.589504000 | 0.000022000  | 0.104351000  |
| Si | -1.674438000 | -1.357424000 | 0.238212000  |
| Si | -0.854225000 | 1.727874000  | 0.046572000  |
| C  | -2.307312000 | -1.596699000 | 1.986276000  |
| H  | -2.855970000 | -0.711366000 | 2.320342000  |
| H  | -2.979313000 | -2.456305000 | 2.059272000  |
| H  | -1.476723000 | -1.753538000 | 2.679275000  |
| C  | -3.130489000 | -1.171671000 | -0.935638000 |
| H  | -2.813200000 | -0.825347000 | -1.923700000 |
| H  | -3.621082000 | -2.140815000 | -1.065818000 |
| H  | -3.879227000 | -0.472045000 | -0.558822000 |
| C  | -0.664997000 | -2.867139000 | -0.274191000 |
| H  | -1.169858000 | -3.798668000 | -0.005856000 |
| H  | -0.507710000 | -2.900288000 | -1.358781000 |
| H  | 0.310646000  | -2.864983000 | 0.223641000  |
| C  | -0.108476000 | 2.522019000  | 1.564282000  |
| H  | -0.598691000 | 2.162742000  | 2.472775000  |
| H  | 0.953150000  | 2.267580000  | 1.629927000  |
| H  | -0.197723000 | 3.611302000  | 1.535525000  |
| C  | -2.686059000 | 2.115032000  | -0.092603000 |
| H  | -2.833600000 | 3.197802000  | -0.045277000 |
| H  | -3.111509000 | 1.764056000  | -1.035832000 |
| H  | -3.257724000 | 1.669115000  | 0.726163000  |
| C  | 0.005238000  | 2.423754000  | -1.486538000 |
| H  | -0.346713000 | 1.939198000  | -2.404940000 |
| H  | -0.197270000 | 3.492568000  | -1.597475000 |
| H  | 1.091759000  | 2.316774000  | -1.402152000 |
| K  | 1.364250000  | -0.540296000 | -1.781564000 |
| C  | 2.365158000  | -0.389083000 | 0.813499000  |
| H  | 0.297389000  | -0.212488000 | 0.610140000  |
| F  | 3.204266000  | -0.200306000 | 1.850400000  |
| F  | 3.136930000  | -1.251667000 | -0.042429000 |
| F  | 2.543475000  | 0.849372000  | 0.061290000  |

**$\eta^2$ -TS1<sub>K</sub>, -1811.42680380, i1003.4229**

|    |              |              |              |
|----|--------------|--------------|--------------|
| N  | 0.465722000  | 0.009753000  | 0.076258000  |
| Si | 1.251869000  | -1.502828000 | -0.165574000 |
| Si | 1.041074000  | 1.619787000  | -0.128478000 |
| C  | 1.621546000  | -1.860047000 | -1.973814000 |
| H  | 2.313834000  | -1.115785000 | -2.379031000 |
| H  | 2.070984000  | -2.847122000 | -2.114950000 |
| H  | 0.702908000  | -1.815191000 | -2.565670000 |
| C  | 2.851270000  | -1.670899000 | 0.819128000  |
| H  | 2.695798000  | -1.435816000 | 1.876625000  |
| H  | 3.230210000  | -2.695613000 | 0.758132000  |
| H  | 3.634026000  | -1.006489000 | 0.445641000  |
| C  | 0.050533000  | -2.824274000 | 0.469925000  |
| H  | 0.384275000  | -3.829823000 | 0.200211000  |
| H  | -0.033575000 | -2.814901000 | 1.564235000  |
| H  | -0.946432000 | -2.687829000 | 0.036920000  |
| C  | 0.799126000  | 2.246248000  | -1.882264000 |
| H  | 1.371137000  | 1.638677000  | -2.589212000 |
| H  | -0.254494000 | 2.182310000  | -2.168173000 |
| H  | 1.120345000  | 3.285818000  | -1.992776000 |
| C  | 2.848593000  | 1.825606000  | 0.352820000  |
| H  | 3.130865000  | 2.882640000  | 0.347285000  |
| H  | 3.051900000  | 1.424757000  | 1.349616000  |
| H  | 3.503270000  | 1.307470000  | -0.353706000 |
| C  | -0.009671000 | 2.720181000  | 1.010477000  |
| H  | 0.190367000  | 2.528813000  | 2.072214000  |
| H  | 0.194778000  | 3.781169000  | 0.844419000  |
| H  | -1.078448000 | 2.574527000  | 0.809397000  |
| C  | -2.152503000 | -0.099543000 | -0.728727000 |
| H  | -0.716648000 | -0.054126000 | -0.367952000 |
| F  | -2.583454000 | -1.173974000 | -1.436315000 |
| F  | -2.996534000 | -0.134320000 | 0.431306000  |
| F  | -2.627610000 | 0.980669000  | -1.400057000 |
| K  | -1.163755000 | -0.109694000 | 2.160528000  |

**$\eta^2$ -P1<sub>K</sub>, -1811.43462805**

|    |              |              |              |
|----|--------------|--------------|--------------|
| N  | -0.595416000 | -0.073754000 | -0.033542000 |
| Si | -1.944242000 | -1.160603000 | 0.225522000  |
| Si | -0.617392000 | 1.683001000  | -0.028424000 |
| C  | -2.923375000 | -0.726960000 | 1.768515000  |
| H  | -3.368672000 | 0.269286000  | 1.689778000  |
| H  | -3.736057000 | -1.439611000 | 1.935122000  |
| H  | -2.279255000 | -0.734947000 | 2.651781000  |

|   |              |              |              |
|---|--------------|--------------|--------------|
| C | -3.097805000 | -1.125901000 | -1.257997000 |
| H | -2.554844000 | -1.315846000 | -2.188477000 |
| H | -3.861973000 | -1.902107000 | -1.156832000 |
| H | -3.612745000 | -0.168608000 | -1.360129000 |
| C | -1.205668000 | -2.879378000 | 0.394290000  |
| H | -1.965517000 | -3.607611000 | 0.689763000  |
| H | -0.775875000 | -3.227316000 | -0.550598000 |
| H | -0.412234000 | -2.895688000 | 1.146461000  |
| C | -0.459582000 | 2.373678000  | 1.701687000  |
| H | -1.289468000 | 2.040717000  | 2.330788000  |
| H | 0.473833000  | 2.030217000  | 2.154383000  |
| H | -0.457124000 | 3.467095000  | 1.695494000  |
| C | -2.223748000 | 2.259641000  | -0.813764000 |
| H | -2.231507000 | 3.351575000  | -0.874976000 |
| H | -2.345709000 | 1.867771000  | -1.827012000 |
| H | -3.097389000 | 1.960843000  | -0.227681000 |
| C | 0.822813000  | 2.284243000  | -1.084170000 |
| H | 0.681948000  | 2.046474000  | -2.145331000 |
| H | 0.908477000  | 3.372700000  | -1.021971000 |
| H | 1.774595000  | 1.873578000  | -0.730987000 |
| C | 2.462128000  | -0.590564000 | 0.662352000  |
| H | 0.249278000  | -0.416822000 | 0.450001000  |
| F | 3.324269000  | -1.334867000 | 1.407422000  |
| F | 3.346124000  | -0.128911000 | -0.412164000 |
| F | 2.346867000  | 0.583162000  | 1.398456000  |
| K | 1.396164000  | -0.790105000 | -1.839635000 |

**(TMS)<sub>2</sub>NH, -873.857781526**

|    |              |              |              |
|----|--------------|--------------|--------------|
| N  | 0.000018000  | -0.002247000 | 0.837277000  |
| Si | -1.576195000 | -0.009119000 | 0.093037000  |
| Si | 1.576197000  | 0.008678000  | 0.092977000  |
| C  | -2.054208000 | 1.694201000  | -0.540341000 |
| H  | -1.331558000 | 2.058242000  | -1.275540000 |
| H  | -3.037758000 | 1.675270000  | -1.018771000 |
| H  | -2.090368000 | 2.418540000  | 0.277538000  |
| C  | -1.569719000 | -1.198472000 | -1.361967000 |
| H  | -1.310765000 | -2.210210000 | -1.039838000 |
| H  | -2.554967000 | -1.233257000 | -1.835311000 |
| H  | -0.851572000 | -0.895968000 | -2.129708000 |
| C  | -2.817390000 | -0.563933000 | 1.385088000  |
| H  | -3.831202000 | -0.570248000 | 0.976575000  |
| H  | -2.591111000 | -1.572548000 | 1.739694000  |
| H  | -2.815936000 | 0.107016000  | 2.248693000  |
| C  | 1.569996000  | 1.206505000  | -1.354948000 |

|   |             |              |              |
|---|-------------|--------------|--------------|
| H | 0.851807000 | 0.908837000  | -2.124524000 |
| H | 1.311220000 | 2.216317000  | -1.026691000 |
| H | 2.555238000 | 1.244069000  | -1.828090000 |
| C | 2.053815000 | -1.691084000 | -0.550080000 |
| H | 3.037189000 | -1.669504000 | -1.028761000 |
| H | 2.090306000 | -2.419891000 | 0.263818000  |
| H | 1.330898000 | -2.051116000 | -1.286972000 |
| C | 2.817460000 | 0.555448000  | 1.388314000  |
| H | 2.815928000 | -0.120960000 | 2.247643000  |
| H | 3.831261000 | 0.564171000  | 0.979813000  |
| H | 2.591432000 | 1.561845000  | 1.749323000  |
| H | 0.000081000 | -0.004686000 | 1.849573000  |

**$\eta^2$ -KCF<sub>3</sub>, -937.550186344**

|   |              |              |              |
|---|--------------|--------------|--------------|
| C | -0.756251000 | -0.000007000 | -0.305609000 |
| F | -1.606112000 | -1.068685000 | -0.257376000 |
| F | -0.236356000 | -0.004349000 | 1.093869000  |
| F | -1.600538000 | 1.073044000  | -0.251900000 |
| K | 1.869714000  | -0.000003000 | -0.180404000 |

**TS[2-3]<sub>K</sub>, -937.549414603, *i*57.3016**

|   |              |              |              |
|---|--------------|--------------|--------------|
| C | -0.772274000 | 0.019789000  | -0.345347000 |
| F | -2.023148000 | -0.453565000 | -0.531673000 |
| F | -0.313312000 | -0.807149000 | 0.796716000  |
| F | -0.984479000 | 1.223309000  | 0.335750000  |
| K | 1.816952000  | 0.011469000  | -0.175530000 |

**$\eta^3$ -KCF<sub>3</sub>, -937.550523238**

|   |              |              |              |
|---|--------------|--------------|--------------|
| C | -0.820723000 | 0.000042000  | -0.415537000 |
| F | -2.162646000 | -0.000403000 | -0.376058000 |
| F | -0.488880000 | -1.091869000 | 0.487952000  |
| F | -0.489434000 | 1.092272000  | 0.487640000  |
| K | 1.746999000  | -0.000013000 | -0.152768000 |

**(CH<sub>3</sub>)<sub>3</sub>SiCl, -869.473001795**

|    |             |              |              |
|----|-------------|--------------|--------------|
| Si | 0.342899000 | 0.000512000  | -0.000290000 |
| C  | 0.887647000 | -0.703118000 | 1.639471000  |
| H  | 0.514973000 | -1.721371000 | 1.769679000  |
| H  | 1.979310000 | -0.728905000 | 1.700519000  |
| H  | 0.514648000 | -0.096560000 | 2.467507000  |
| C  | 0.887506000 | -1.068239000 | -1.428486000 |
| H  | 0.514350000 | -2.088425000 | -1.316911000 |
| H  | 0.514697000 | -0.672558000 | -2.375622000 |
| H  | 1.979129000 | -1.108797000 | -1.482394000 |



|    |              |              |              |
|----|--------------|--------------|--------------|
| C  | 0.885565000  | 1.772152000  | -0.210714000 |
| H  | 0.513982000  | 2.184318000  | -1.151309000 |
| H  | 0.509777000  | 2.394515000  | 0.604090000  |
| H  | 1.977087000  | 1.840591000  | -0.216315000 |
| Cl | -1.751932000 | -0.000868000 | 0.000187000  |

**$\eta^3$ -C2<sub>K</sub>, -1807.04442525**

|    |              |              |              |
|----|--------------|--------------|--------------|
| Si | 1.985291000  | -0.402188000 | -0.003702000 |
| C  | 1.248299000  | -1.059183000 | 1.569377000  |
| H  | 1.591146000  | -2.086648000 | 1.725525000  |
| H  | 1.566490000  | -0.464650000 | 2.429120000  |
| H  | 0.157740000  | -1.071126000 | 1.525326000  |
| C  | 1.420953000  | -1.265975000 | -1.544170000 |
| H  | 0.329658000  | -1.263187000 | -1.585226000 |
| H  | 1.824407000  | -0.785738000 | -2.438144000 |
| H  | 1.765101000  | -2.304484000 | -1.529512000 |
| C  | 3.842742000  | -0.258068000 | 0.101823000  |
| H  | 4.254024000  | 0.203234000  | -0.798401000 |
| H  | 4.142977000  | 0.342185000  | 0.963317000  |
| H  | 4.288768000  | -1.251269000 | 0.208286000  |
| Cl | 1.348730000  | 1.644147000  | -0.169688000 |
| C  | -1.883505000 | -0.827647000 | -0.179504000 |
| F  | -2.088202000 | -2.164430000 | -0.221488000 |
| F  | -2.149161000 | -0.528193000 | 1.214904000  |
| F  | -3.107473000 | -0.311800000 | -0.728952000 |
| K  | -1.700537000 | 1.782466000  | 0.019522000  |

**$\eta^3$ -TS2<sub>K</sub>, -1807.04012393, i85.4633**

|    |              |              |              |
|----|--------------|--------------|--------------|
| Si | -1.642061000 | 0.123447000  | 0.000189000  |
| C  | -1.425532000 | 0.996858000  | 1.642902000  |
| H  | -1.121585000 | 2.032875000  | 1.480064000  |
| H  | -2.356152000 | 0.978146000  | 2.215350000  |
| H  | -0.638494000 | 0.521473000  | 2.229961000  |
| C  | -1.425245000 | 0.996832000  | -1.642495000 |
| H  | -0.637804000 | 0.521818000  | -2.229305000 |
| H  | -2.355672000 | 0.977776000  | -2.215245000 |
| H  | -1.121784000 | 2.032972000  | -1.479488000 |
| C  | -3.416606000 | -0.523511000 | 0.000027000  |
| H  | -3.630410000 | -1.127771000 | -0.884928000 |
| H  | -3.630718000 | -1.127342000 | 0.885200000  |
| H  | -4.107705000 | 0.326903000  | -0.000293000 |
| Cl | -0.668183000 | -1.827355000 | 0.000352000  |
| C  | 0.976803000  | 1.068197000  | 0.000190000  |
| F  | 0.932302000  | 2.423737000  | 0.000166000  |

|   |              |               |               |
|---|--------------|---------------|---------------|
| F | 1. 882932000 | 0. 807669000  | 1. 090878000  |
| F | 1. 881752000 | 0. 807663000  | -1. 091515000 |
| K | 2. 285205000 | -1. 441154000 | -0. 000497000 |

**P2<sub>K</sub>, -1807.08047612**

|    |               |               |               |
|----|---------------|---------------|---------------|
| Si | -1. 826471000 | 0. 563379000  | -0. 009030000 |
| C  | -3. 006726000 | 0. 127045000  | -1. 392278000 |
| H  | -3. 517067000 | -0. 818930000 | -1. 199580000 |
| H  | -3. 765938000 | 0. 905549000  | -1. 501897000 |
| H  | -2. 478168000 | 0. 044264000  | -2. 345014000 |
| C  | -2. 634266000 | 0. 481823000  | 1. 673405000  |
| H  | -1. 897763000 | 0. 644685000  | 2. 463453000  |
| H  | -3. 399678000 | 1. 256361000  | 1. 765899000  |
| H  | -3. 112373000 | -0. 486217000 | 1. 840206000  |
| C  | -0. 872574000 | 2. 121010000  | -0. 313136000 |
| H  | -0. 141954000 | 2. 316806000  | 0. 474195000  |
| H  | -0. 304392000 | 2. 074524000  | -1. 244458000 |
| H  | -1. 569524000 | 2. 962541000  | -0. 371764000 |
| Cl | 2. 550636000  | 1. 715952000  | 0. 018840000  |
| C  | -0. 606523000 | -0. 960515000 | 0. 011896000  |
| F  | -1. 265156000 | -2. 137201000 | 0. 054431000  |
| F  | 0. 213846000  | -1. 047196000 | -1. 077730000 |
| F  | 0. 247826000  | -0. 989932000 | 1. 076560000  |
| K  | 2. 755185000  | -1. 000279000 | -0. 022820000 |

**(CH<sub>3</sub>)<sub>3</sub>SiCF<sub>3</sub>, -746.864819869**

|    |               |               |               |
|----|---------------|---------------|---------------|
| Si | 1. 256581000  | -0. 683653000 | -0. 043152000 |
| C  | 2. 401447000  | -0. 734248000 | -1. 517764000 |
| H  | 3. 126414000  | 0. 081778000  | -1. 475704000 |
| H  | 2. 954375000  | -1. 676222000 | -1. 548204000 |
| H  | 1. 839876000  | -0. 642044000 | -2. 450118000 |
| C  | 2. 165422000  | -0. 698698000 | 1. 587821000  |
| H  | 1. 469298000  | -0. 583564000 | 2. 421636000  |
| H  | 2. 701511000  | -1. 641295000 | 1. 723077000  |
| H  | 2. 892947000  | 0. 114540000  | 1. 637685000  |
| C  | -0. 102726000 | -1. 960728000 | -0. 130696000 |
| H  | -0. 814127000 | -1. 829920000 | 0. 687731000  |
| H  | -0. 650640000 | -1. 882410000 | -1. 072422000 |
| H  | 0. 308800000  | -2. 970756000 | -0. 061832000 |
| C  | 0. 364548000  | 1. 034261000  | -0. 129605000 |
| F  | 1. 230162000  | 2. 072886000  | -0. 090592000 |
| F  | -0. 358905000 | 1. 188241000  | -1. 261761000 |
| F  | -0. 495983000 | 1. 221613000  | 0. 897246000  |

**KCl, -1060.19605605**

|    |             |             |              |
|----|-------------|-------------|--------------|
| K  | 0.000000000 | 0.000000000 | 1.267504000  |
| Cl | 0.000000000 | 0.000000000 | -1.416622000 |

**K<sup>+</sup>, -599.743189344**

|   |             |             |             |
|---|-------------|-------------|-------------|
| K | 0.000000000 | 0.000000000 | 0.000000000 |
|---|-------------|-------------|-------------|

**CF<sub>3</sub><sup>-</sup>, -337.623798522**

|   |              |              |              |
|---|--------------|--------------|--------------|
| C | -0.000128000 | 0.000080000  | 0.548975000  |
| F | -0.973270000 | -0.790249000 | -0.122006000 |
| F | 1.171192000  | -0.447613000 | -0.121959000 |
| F | -0.197837000 | 1.237809000  | -0.122018000 |

**:CF<sub>2</sub>, -237.693295140**

|   |             |              |              |
|---|-------------|--------------|--------------|
| C | 0.000000000 | 0.000000000  | 0.596391000  |
| F | 0.000000000 | 1.023734000  | -0.198797000 |
| F | 0.000000000 | -1.023734000 | -0.198797000 |

**KF, -699.809211215**

|   |             |             |              |
|---|-------------|-------------|--------------|
| F | 0.000000000 | 0.000000000 | -1.486793000 |
| K | 0.000000000 | 0.000000000 | 0.704270000  |

**(TMS)<sub>2</sub>NNa, -1035.52893376**

|    |              |              |              |
|----|--------------|--------------|--------------|
| N  | 0.000002000  | 0.386464000  | 0.000790000  |
| Si | 1.566115000  | -0.236797000 | 0.000133000  |
| Si | -1.566109000 | -0.236800000 | 0.000104000  |
| C  | 2.002304000  | -1.280228000 | 1.515278000  |
| H  | 1.400407000  | -2.193768000 | 1.536170000  |
| H  | 3.055842000  | -1.576329000 | 1.521077000  |
| H  | 1.794846000  | -0.731678000 | 2.438341000  |
| C  | 2.006196000  | -1.265837000 | -1.523720000 |
| H  | 1.798948000  | -0.709292000 | -2.442048000 |
| H  | 3.060295000  | -1.559894000 | -1.530717000 |
| H  | 1.405916000  | -2.180180000 | -1.553661000 |
| C  | 2.762253000  | 1.254312000  | 0.008404000  |
| H  | 3.811509000  | 0.945930000  | 0.008435000  |
| H  | 2.623766000  | 1.880749000  | -0.882758000 |
| H  | 2.620898000  | 1.872432000  | 0.904838000  |
| C  | -2.007887000 | -1.264284000 | 1.524501000  |
| H  | -1.407508000 | -2.178517000 | 1.555982000  |
| H  | -1.801663000 | -0.706799000 | 2.442485000  |
| H  | -3.061962000 | -1.558443000 | 1.530665000  |
| C  | -2.000620000 | -1.281772000 | -1.514469000 |
| H  | -3.054168000 | -1.577831000 | -1.521046000 |

|    |              |              |              |
|----|--------------|--------------|--------------|
| H  | -1.792219000 | -0.734140000 | -2.437868000 |
| H  | -1.398785000 | -2.195378000 | -1.533872000 |
| C  | -2.762243000 | 1.254295000  | -0.011088000 |
| H  | -2.620022000 | 1.871292000  | -0.908153000 |
| H  | -3.811497000 | 0.945904000  | -0.011715000 |
| H  | -2.624635000 | 1.881854000  | 0.879425000  |
| Na | -0.000007000 | 2.539116000  | 0.000194000  |

**$\eta^2$ -C1<sub>Na</sub>, -1373.78524077**

|    |              |              |              |
|----|--------------|--------------|--------------|
| N  | -0.505116000 | 0.000048000  | 0.200831000  |
| Si | -1.044651000 | 1.567427000  | -0.120372000 |
| Si | -1.045204000 | -1.567123000 | -0.120455000 |
| C  | -0.227736000 | 2.343189000  | -1.643799000 |
| H  | -0.416250000 | 1.735528000  | -2.534569000 |
| H  | -0.613042000 | 3.348174000  | -1.841059000 |
| H  | 0.856369000  | 2.430906000  | -1.518209000 |
| C  | -2.909448000 | 1.769387000  | -0.338388000 |
| H  | -3.455017000 | 1.351342000  | 0.512087000  |
| H  | -3.181871000 | 2.825050000  | -0.431428000 |
| H  | -3.259970000 | 1.256123000  | -1.238113000 |
| C  | -0.542432000 | 2.681783000  | 1.346680000  |
| H  | -0.854843000 | 3.719510000  | 1.198615000  |
| H  | -1.008008000 | 2.343384000  | 2.280600000  |
| H  | 0.547028000  | 2.707293000  | 1.478794000  |
| C  | -0.228798000 | -2.342960000 | -1.644109000 |
| H  | -0.417450000 | -1.735233000 | -2.534803000 |
| H  | 0.855328000  | -2.430798000 | -1.518781000 |
| H  | -0.614269000 | -3.347892000 | -1.841319000 |
| C  | -2.910106000 | -1.768491000 | -0.338106000 |
| H  | -3.182867000 | -2.824047000 | -0.431358000 |
| H  | -3.455366000 | -1.350500000 | 0.512594000  |
| H  | -3.260666000 | -1.254887000 | -1.237621000 |
| C  | -0.543014000 | -2.681762000 | 1.346402000  |
| H  | -1.008265000 | -2.343294000 | 2.280463000  |
| H  | -0.855806000 | -3.719373000 | 1.198336000  |
| H  | 0.546469000  | -2.707648000 | 1.478251000  |
| C  | 2.412580000  | -0.000267000 | -0.477947000 |
| H  | 1.517297000  | -0.000126000 | -1.092789000 |
| F  | 3.546691000  | -0.000274000 | -1.163622000 |
| F  | 2.425174000  | 1.074099000  | 0.342721000  |
| F  | 2.425004000  | -1.074848000 | 0.342439000  |
| Na | 0.743353000  | -0.000381000 | 2.004349000  |

**$\eta^3$ -TS1<sub>Na</sub>, -1373.75987129, *i*1103.9131**

|    |              |              |              |
|----|--------------|--------------|--------------|
| N  | 0.368627000  | -0.000020000 | -0.154433000 |
| Si | 1.023525000  | -1.591777000 | -0.155721000 |
| Si | 1.023410000  | 1.591774000  | -0.155747000 |
| C  | 0.192712000  | -2.625913000 | -1.482840000 |
| H  | 0.401639000  | -2.222856000 | -2.477113000 |
| H  | 0.536067000  | -3.663810000 | -1.458162000 |
| H  | -0.892447000 | -2.627470000 | -1.346982000 |
| C  | 2.889958000  | -1.693085000 | -0.351595000 |
| H  | 3.418619000  | -1.195786000 | 0.465094000  |
| H  | 3.199097000  | -2.742846000 | -0.356122000 |
| H  | 3.224121000  | -1.244789000 | -1.290136000 |
| C  | 0.608480000  | -2.411885000 | 1.515525000  |
| H  | 1.037799000  | -3.415011000 | 1.588128000  |
| H  | 1.015048000  | -1.842505000 | 2.361893000  |
| H  | -0.474213000 | -2.539073000 | 1.643563000  |
| C  | 0.192814000  | 2.625882000  | -1.483019000 |
| H  | 0.402444000  | 2.223233000  | -2.477307000 |
| H  | -0.892414000 | 2.626913000  | -1.347719000 |
| H  | 0.535684000  | 3.663928000  | -1.457846000 |
| C  | 2.889880000  | 1.693148000  | -0.351341000 |
| H  | 3.198966000  | 2.742923000  | -0.355992000 |
| H  | 3.418463000  | 1.196026000  | 0.465507000  |
| H  | 3.224222000  | 1.244733000  | -1.289761000 |
| C  | 0.608073000  | 2.412038000  | 1.515358000  |
| H  | 1.014526000  | 1.842806000  | 2.361882000  |
| H  | 1.037367000  | 3.415183000  | 1.587880000  |
| H  | -0.474641000 | 2.539249000  | 1.643210000  |
| C  | -2.237226000 | -0.000115000 | -0.511752000 |
| H  | -0.819647000 | -0.000087000 | -0.633131000 |
| F  | -3.296569000 | -0.000230000 | -1.318330000 |
| F  | -2.463771000 | -1.080246000 | 0.376365000  |
| F  | -2.463759000 | 1.080244000  | 0.376075000  |
| Na | -0.927221000 | 0.000099000  | 1.800518000  |

**$\eta^3$ -P1<sub>Na</sub>, -1373.76872411**

|    |              |              |              |
|----|--------------|--------------|--------------|
| N  | 0.467511000  | -0.005869000 | -0.317704000 |
| Si | 1.115480000  | -1.624593000 | -0.170937000 |
| Si | 1.082593000  | 1.622401000  | -0.150855000 |
| C  | 0.227182000  | -2.706437000 | -1.402878000 |
| H  | 0.482556000  | -2.426780000 | -2.427864000 |
| H  | 0.480082000  | -3.760706000 | -1.264147000 |
| H  | -0.853587000 | -2.590700000 | -1.282628000 |
| C  | 2.973781000  | -1.693109000 | -0.404617000 |
| H  | 3.518327000  | -1.151013000 | 0.371274000  |

|    |              |              |              |
|----|--------------|--------------|--------------|
| H  | 3.301361000  | -2.736410000 | -0.368863000 |
| H  | 3.269379000  | -1.285873000 | -1.374282000 |
| C  | 0.737109000  | -2.254059000 | 1.578194000  |
| H  | 1.235168000  | -3.207841000 | 1.771698000  |
| H  | 1.091097000  | -1.559870000 | 2.351158000  |
| H  | -0.335566000 | -2.440876000 | 1.709080000  |
| C  | 0.340697000  | 2.664259000  | -1.508276000 |
| H  | 0.704141000  | 2.351266000  | -2.489832000 |
| H  | -0.747143000 | 2.548986000  | -1.500992000 |
| H  | 0.574875000  | 3.723775000  | -1.378020000 |
| C  | 2.955989000  | 1.681498000  | -0.151344000 |
| H  | 3.281784000  | 2.725544000  | -0.122112000 |
| H  | 3.389589000  | 1.181421000  | 0.718223000  |
| H  | 3.376876000  | 1.225273000  | -1.049695000 |
| C  | 0.505097000  | 2.319704000  | 1.517515000  |
| H  | 0.822862000  | 1.696507000  | 2.363978000  |
| H  | 0.935652000  | 3.309098000  | 1.694305000  |
| H  | -0.583081000 | 2.451694000  | 1.537215000  |
| C  | -2.501916000 | -0.064096000 | -0.711963000 |
| H  | -0.389715000 | -0.015070000 | -0.895988000 |
| F  | -3.822346000 | -0.088836000 | -0.943617000 |
| F  | -2.379888000 | -1.144147000 | 0.294705000  |
| F  | -2.412051000 | 1.053862000  | 0.252504000  |
| Na | -1.058257000 | -0.008901000 | 1.597088000  |

**$\eta^1$ -C1<sub>Na</sub>, -1373.78527417**

|    |              |              |              |
|----|--------------|--------------|--------------|
| N  | -0.568111000 | 0.016446000  | 0.250241000  |
| Si | -0.958997000 | 1.619539000  | -0.118753000 |
| Si | -1.192286000 | -1.503554000 | -0.144074000 |
| C  | -0.302811000 | 2.196667000  | -1.796773000 |
| H  | -0.713563000 | 1.577148000  | -2.599930000 |
| H  | -0.575569000 | 3.235592000  | -2.005460000 |
| H  | 0.788373000  | 2.127017000  | -1.849277000 |
| C  | -2.801050000 | 2.032943000  | -0.066264000 |
| H  | -3.238608000 | 1.747916000  | 0.894945000  |
| H  | -2.976801000 | 3.102524000  | -0.215249000 |
| H  | -3.346091000 | 1.494550000  | -0.846601000 |
| C  | -0.108078000 | 2.719659000  | 1.188313000  |
| H  | -0.253442000 | 3.785246000  | 0.990367000  |
| H  | -0.509316000 | 2.535816000  | 2.193844000  |
| H  | 0.976931000  | 2.552183000  | 1.202684000  |
| C  | -0.407331000 | -2.257297000 | -1.692739000 |
| H  | -0.548679000 | -1.594843000 | -2.552451000 |
| H  | 0.669226000  | -2.414549000 | -1.568840000 |

|    |              |              |              |
|----|--------------|--------------|--------------|
| H  | -0.850503000 | -3.225926000 | -1.942931000 |
| C  | -3.063971000 | -1.581011000 | -0.375658000 |
| H  | -3.414636000 | -2.611796000 | -0.481992000 |
| H  | -3.584464000 | -1.127308000 | 0.472375000  |
| H  | -3.364144000 | -1.035207000 | -1.275105000 |
| C  | -0.744975000 | -2.687809000 | 1.285881000  |
| H  | -1.210638000 | -2.372468000 | 2.228243000  |
| H  | -1.080634000 | -3.711681000 | 1.099258000  |
| H  | 0.343189000  | -2.745134000 | 1.427779000  |
| C  | 2.491194000  | -0.133268000 | -0.393754000 |
| H  | 1.453298000  | -0.140732000 | -0.729920000 |
| F  | 3.102641000  | 1.021913000  | -0.637584000 |
| F  | 2.502831000  | -0.296695000 | 0.970369000  |
| F  | 3.223964000  | -1.118801000 | -0.897441000 |
| Na | 0.517094000  | -0.101302000 | 2.152183000  |

**$\eta^2$ -TS1<sub>Na</sub>, -1373.75988866, i921.7890**

|    |              |              |              |
|----|--------------|--------------|--------------|
| N  | -0.349039000 | -0.023169000 | -0.223378000 |
| Si | -1.454244000 | -1.332987000 | 0.046825000  |
| Si | -0.656015000 | 1.644447000  | 0.135756000  |
| C  | -2.300771000 | -1.220690000 | 1.725161000  |
| H  | -2.880079000 | -0.296959000 | 1.819359000  |
| H  | -2.986977000 | -2.057433000 | 1.883023000  |
| H  | -1.562036000 | -1.233619000 | 2.531384000  |
| C  | -2.794174000 | -1.385139000 | -1.278384000 |
| H  | -2.362822000 | -1.497756000 | -2.278059000 |
| H  | -3.470618000 | -2.229462000 | -1.116023000 |
| H  | -3.396366000 | -0.472588000 | -1.275521000 |
| C  | -0.460878000 | -2.928264000 | -0.035809000 |
| H  | -1.089598000 | -3.797341000 | 0.176073000  |
| H  | -0.019994000 | -3.079838000 | -1.026810000 |
| H  | 0.358123000  | -2.919509000 | 0.688448000  |
| C  | -0.361941000 | 2.047842000  | 1.943992000  |
| H  | -1.050887000 | 1.489309000  | 2.583319000  |
| H  | 0.657162000  | 1.771094000  | 2.228859000  |
| H  | -0.496892000 | 3.113271000  | 2.149802000  |
| C  | -2.385469000 | 2.187717000  | -0.366958000 |
| H  | -2.518903000 | 3.258822000  | -0.189620000 |
| H  | -2.574519000 | 1.995553000  | -1.426878000 |
| H  | -3.153645000 | 1.662595000  | 0.207905000  |
| C  | 0.599585000  | 2.641550000  | -0.884223000 |
| H  | 0.395641000  | 2.604005000  | -1.963199000 |
| H  | 0.576574000  | 3.700874000  | -0.615410000 |
| H  | 1.623937000  | 2.297609000  | -0.692664000 |

|    |             |              |              |
|----|-------------|--------------|--------------|
| C  | 2.253175000 | -0.508407000 | 0.406770000  |
| H  | 0.789052000 | -0.312420000 | 0.215905000  |
| F  | 2.808566000 | -1.666427000 | 0.817915000  |
| F  | 2.808377000 | -0.361638000 | -0.934713000 |
| F  | 2.913822000 | 0.464409000  | 1.083630000  |
| Na | 1.006882000 | 0.079161000  | -2.059740000 |

**$\eta^2$ -P1<sub>Na</sub>, -1373.76830614**

|    |              |              |              |
|----|--------------|--------------|--------------|
| N  | -0.495442000 | -0.095682000 | -0.037004000 |
| Si | -1.865274000 | -1.195054000 | 0.094131000  |
| Si | -0.517164000 | 1.671915000  | 0.036277000  |
| C  | -2.807067000 | -0.940079000 | 1.696060000  |
| H  | -3.212239000 | 0.073418000  | 1.765273000  |
| H  | -3.644117000 | -1.638549000 | 1.780670000  |
| H  | -2.151933000 | -1.095690000 | 2.557462000  |
| C  | -3.022788000 | -0.965376000 | -1.364830000 |
| H  | -2.478280000 | -0.940064000 | -2.313076000 |
| H  | -3.719616000 | -1.807517000 | -1.409089000 |
| H  | -3.615671000 | -0.052101000 | -1.292972000 |
| C  | -1.140245000 | -2.924952000 | 0.043995000  |
| H  | -1.907241000 | -3.677833000 | 0.244269000  |
| H  | -0.712233000 | -3.155250000 | -0.937034000 |
| H  | -0.346510000 | -3.046668000 | 0.785994000  |
| C  | -0.251786000 | 2.246744000  | 1.793334000  |
| H  | -1.041683000 | 1.873341000  | 2.450510000  |
| H  | 0.706597000  | 1.875037000  | 2.164647000  |
| H  | -0.243363000 | 3.337954000  | 1.859589000  |
| C  | -2.161753000 | 2.287087000  | -0.627281000 |
| H  | -2.163577000 | 3.380733000  | -0.617629000 |
| H  | -2.333382000 | 1.965785000  | -1.657767000 |
| H  | -3.008484000 | 1.955024000  | -0.020547000 |
| C  | 0.860897000  | 2.308081000  | -1.070186000 |
| H  | 0.694699000  | 2.044459000  | -2.121813000 |
| H  | 0.909670000  | 3.399893000  | -1.030598000 |
| H  | 1.837214000  | 1.929427000  | -0.752748000 |
| C  | 2.661910000  | -0.837187000 | 0.258872000  |
| H  | 0.268413000  | -0.440240000 | 0.555491000  |
| F  | 3.762679000  | -1.414580000 | 0.785475000  |
| F  | 3.237664000  | -0.070185000 | -0.864172000 |
| F  | 2.402977000  | 0.214729000  | 1.145441000  |
| Na | 1.229007000  | -0.691183000 | -1.596163000 |

**$\eta^2$ -NaCF<sub>3</sub>, -499.881555903**

|   |              |             |              |
|---|--------------|-------------|--------------|
| C | -0.358742000 | 0.000228000 | -0.305293000 |
|---|--------------|-------------|--------------|



|    |              |              |              |
|----|--------------|--------------|--------------|
| F  | -1.193311000 | -1.067027000 | -0.208702000 |
| F  | 0.266059000  | -0.003501000 | 1.055686000  |
| F  | -1.189846000 | 1.069967000  | -0.204494000 |
| Na | 1.927849000  | 0.000334000  | -0.359150000 |

**TS[2-3]<sub>Na</sub>, -499.878384616, i87.3442**

|    |              |              |              |
|----|--------------|--------------|--------------|
| C  | -0.420225000 | 0.013198000  | -0.385833000 |
| F  | -1.740060000 | -0.193465000 | -0.384976000 |
| F  | 0.058445000  | -0.994172000 | 0.581548000  |
| F  | -0.265521000 | 1.160557000  | 0.441836000  |
| Na | 1.822325000  | 0.014957000  | -0.311879000 |

**$\eta^3$ -NaCF<sub>3</sub>, -499.878619326**

|    |              |              |              |
|----|--------------|--------------|--------------|
| C  | -0.452320000 | 0.000058000  | -0.419166000 |
| F  | -1.780122000 | -0.000800000 | -0.301952000 |
| F  | -0.053607000 | -1.091887000 | 0.462197000  |
| F  | -0.054941000 | 1.092598000  | 0.461703000  |
| Na | 1.791995000  | 0.000041000  | -0.280231000 |

**$\eta^3$ -C<sub>2</sub>Na<sub>3</sub>, -1369.37563524**

|    |              |              |              |
|----|--------------|--------------|--------------|
| Si | 1.837130000  | -0.450539000 | 0.039099000  |
| C  | 1.197633000  | -1.111020000 | 1.649531000  |
| H  | 1.507956000  | -2.153826000 | 1.765551000  |
| H  | 1.589798000  | -0.544050000 | 2.496565000  |
| H  | 0.105743000  | -1.072455000 | 1.653679000  |
| C  | 1.056007000  | -1.197975000 | -1.469086000 |
| H  | -0.030375000 | -1.091270000 | -1.445875000 |
| H  | 1.441084000  | -0.737161000 | -2.381367000 |
| H  | 1.289121000  | -2.266532000 | -1.505361000 |
| C  | 3.697979000  | -0.419192000 | -0.053949000 |
| H  | 4.039805000  | 0.062588000  | -0.972262000 |
| H  | 4.128815000  | 0.113496000  | 0.796213000  |
| H  | 4.085185000  | -1.442192000 | -0.043558000 |
| Cl | 1.313491000  | 1.645790000  | -0.001382000 |
| C  | -2.159937000 | -0.507711000 | 0.190414000  |
| F  | -2.876491000 | -1.641018000 | 0.165903000  |
| F  | -3.113858000 | 0.449928000  | 0.725057000  |
| F  | -2.229820000 | -0.071737000 | -1.200960000 |
| Na | -1.361352000 | 1.658305000  | 0.000097000  |

**$\eta^3$ -TS<sub>2</sub>Na<sub>3</sub>, -1369.37176277, i65.0607**

|    |              |              |              |
|----|--------------|--------------|--------------|
| Si | -1.462866000 | -0.363825000 | 0.001152000  |
| C  | -1.039605000 | -1.181574000 | -1.623687000 |
| H  | -0.507347000 | -2.117233000 | -1.441098000 |

|    |              |              |              |
|----|--------------|--------------|--------------|
| H  | -1.945212000 | -1.386308000 | -2.200440000 |
| H  | -0.377844000 | -0.549375000 | -2.217160000 |
| C  | -1.034898000 | -1.171691000 | 1.629668000  |
| H  | -0.373052000 | -0.535266000 | 2.218500000  |
| H  | -1.938810000 | -1.374800000 | 2.209623000  |
| H  | -0.501324000 | -2.107383000 | 1.451215000  |
| C  | -3.318003000 | -0.044435000 | 0.001945000  |
| H  | -3.629182000 | 0.522752000  | 0.882389000  |
| H  | -3.630963000 | 0.507674000  | -0.887516000 |
| H  | -3.854340000 | -0.999267000 | 0.010626000  |
| Cl | -0.846776000 | 1.736770000  | -0.005818000 |
| C  | 1.414140000  | -0.688300000 | -0.001924000 |
| F  | 1.975681000  | -1.911294000 | -0.003309000 |
| F  | 2.131003000  | -0.035628000 | -1.092916000 |
| F  | 2.127102000  | -0.039885000 | 1.094525000  |
| Na | 1.763593000  | 1.818629000  | 0.003264000  |

**P2<sub>Na</sub>, -1369.41535535**

|    |              |              |              |
|----|--------------|--------------|--------------|
| Si | 1.490620000  | -0.737097000 | -0.013299000 |
| C  | 2.689914000  | -0.573572000 | -1.436249000 |
| H  | 3.398785000  | 0.240523000  | -1.270784000 |
| H  | 3.260121000  | -1.498508000 | -1.554261000 |
| H  | 2.163368000  | -0.387031000 | -2.375061000 |
| C  | 2.344340000  | -0.828530000 | 1.643701000  |
| H  | 1.618863000  | -0.821608000 | 2.460037000  |
| H  | 2.920670000  | -1.754237000 | 1.717943000  |
| H  | 3.033011000  | 0.007442000  | 1.784986000  |
| C  | 0.184671000  | -2.026694000 | -0.273808000 |
| H  | -0.580491000 | -2.012398000 | 0.506009000  |
| H  | -0.340950000 | -1.887734000 | -1.221150000 |
| H  | 0.651144000  | -3.016178000 | -0.285593000 |
| Cl | -3.227284000 | -1.025650000 | 0.030741000  |
| C  | 0.604932000  | 1.003921000  | 0.026767000  |
| F  | 1.452837000  | 2.039571000  | 0.094674000  |
| F  | -0.188097000 | 1.248227000  | -1.069044000 |
| F  | -0.259924000 | 1.164976000  | 1.077677000  |
| Na | -2.374169000 | 1.214493000  | -0.071889000 |

**NaCl, -622.528625170**

|    |             |             |              |
|----|-------------|-------------|--------------|
| Na | 0.000000000 | 0.000000000 | -1.436666000 |
| Cl | 0.000000000 | 0.000000000 | 0.929607000  |

**Na<sup>+</sup>, -162.050222488**

|    |             |             |             |
|----|-------------|-------------|-------------|
| Na | 0.000000000 | 0.000000000 | 0.000000000 |
|----|-------------|-------------|-------------|

**NaF, -262.140278332**

|    |             |             |              |
|----|-------------|-------------|--------------|
| F  | 0.000000000 | 0.000000000 | -1.064739000 |
| Na | 0.000000000 | 0.000000000 | 0.871150000  |

**(TMS)<sub>2</sub>NLi, -880.798954619**

|    |              |              |              |
|----|--------------|--------------|--------------|
| N  | 0.014333000  | 0.743299000  | -0.060290000 |
| Si | 1.573401000  | 0.056601000  | -0.015455000 |
| Si | -1.495386000 | -0.023287000 | -0.006109000 |
| C  | 2.121424000  | -0.345678000 | 1.748405000  |
| H  | 1.434180000  | -1.062029000 | 2.208807000  |
| H  | 3.126767000  | -0.776272000 | 1.779761000  |
| H  | 2.120815000  | 0.555168000  | 2.369201000  |
| C  | 1.684803000  | -1.552205000 | -1.003116000 |
| H  | 1.374080000  | -1.398329000 | -2.040491000 |
| H  | 2.702721000  | -1.952698000 | -1.009608000 |
| H  | 1.033131000  | -2.319645000 | -0.571732000 |
| C  | 2.832708000  | 1.271259000  | -0.729345000 |
| H  | 3.847463000  | 0.864382000  | -0.701959000 |
| H  | 2.595786000  | 1.512558000  | -1.769550000 |
| H  | 2.841186000  | 2.205751000  | -0.158578000 |
| C  | -1.797419000 | -1.132907000 | 1.487373000  |
| H  | -1.134550000 | -2.003259000 | 1.449948000  |
| H  | -1.588633000 | -0.602679000 | 2.420357000  |
| H  | -2.825903000 | -1.503971000 | 1.523032000  |
| C  | -1.980000000 | -0.997947000 | -1.545078000 |
| H  | -2.995674000 | -1.397574000 | -1.469251000 |
| H  | -1.923263000 | -0.372001000 | -2.439794000 |
| H  | -1.298765000 | -1.840754000 | -1.691458000 |
| C  | -2.762273000 | 1.426502000  | 0.119991000  |
| H  | -2.747980000 | 2.099282000  | -0.751694000 |
| H  | -3.782234000 | 1.036468000  | 0.153313000  |
| H  | -2.649899000 | 2.021489000  | 1.038317000  |
| Li | -0.639080000 | 2.416826000  | -0.028028000 |

**$\eta^1$ -C1<sub>Li</sub>, -1219.05566844**

|    |              |              |              |
|----|--------------|--------------|--------------|
| N  | -0.424231000 | -0.025093000 | -0.407431000 |
| Si | -1.251733000 | -1.462774000 | -0.008959000 |
| Si | -0.853088000 | 1.566603000  | 0.012726000  |
| C  | -1.997376000 | -1.426157000 | 1.728269000  |
| H  | -2.734970000 | -0.623701000 | 1.832204000  |
| H  | -2.502672000 | -2.367412000 | 1.963885000  |
| H  | -1.223658000 | -1.263488000 | 2.484746000  |
| C  | -2.656768000 | -1.848607000 | -1.210358000 |

|    |              |              |              |
|----|--------------|--------------|--------------|
| H  | -2.279810000 | -1.955125000 | -2.231931000 |
| H  | -3.178757000 | -2.773242000 | -0.947278000 |
| H  | -3.390947000 | -1.037134000 | -1.212926000 |
| C  | -0.047569000 | -2.924072000 | -0.067270000 |
| H  | -0.575303000 | -3.876246000 | 0.038865000  |
| H  | 0.495158000  | -2.958613000 | -1.018019000 |
| H  | 0.692312000  | -2.879648000 | 0.738921000  |
| C  | -0.464053000 | 2.047295000  | 1.792580000  |
| H  | -1.058053000 | 1.444039000  | 2.485193000  |
| H  | 0.591141000  | 1.876875000  | 2.024470000  |
| H  | -0.688364000 | 3.099778000  | 1.989405000  |
| C  | -2.644580000 | 2.040398000  | -0.337380000 |
| H  | -2.842311000 | 3.090987000  | -0.105325000 |
| H  | -2.896649000 | 1.868388000  | -1.387576000 |
| H  | -3.327281000 | 1.434726000  | 0.266614000  |
| C  | 0.242847000  | 2.681817000  | -1.104373000 |
| H  | 0.034862000  | 2.561740000  | -2.178430000 |
| H  | 0.049450000  | 3.736664000  | -0.894597000 |
| H  | 1.318154000  | 2.539172000  | -0.928451000 |
| C  | 2.617165000  | -0.353568000 | 0.172845000  |
| H  | 1.642690000  | -0.677290000 | 0.531803000  |
| F  | 3.570977000  | -1.261653000 | 0.293346000  |
| F  | 2.507548000  | -0.078596000 | -1.176175000 |
| F  | 3.014252000  | 0.774194000  | 0.747484000  |
| Li | 0.726372000  | 0.424478000  | -1.760022000 |

**$\eta^2$ -TS1<sub>Li</sub>, -1219.02776517, i948.6121**

|    |              |              |              |
|----|--------------|--------------|--------------|
| N  | -0.271393000 | -0.026168000 | -0.300255000 |
| Si | -1.366766000 | -1.348364000 | 0.002233000  |
| Si | -0.592432000 | 1.650178000  | 0.037918000  |
| C  | -2.148023000 | -1.216433000 | 1.709759000  |
| H  | -2.754450000 | -0.310864000 | 1.808177000  |
| H  | -2.798382000 | -2.070942000 | 1.916527000  |
| H  | -1.376090000 | -1.186894000 | 2.483990000  |
| C  | -2.742248000 | -1.404870000 | -1.280349000 |
| H  | -2.338948000 | -1.510781000 | -2.291694000 |
| H  | -3.404069000 | -2.256721000 | -1.098382000 |
| H  | -3.354117000 | -0.499425000 | -1.256007000 |
| C  | -0.360979000 | -2.931648000 | -0.095008000 |
| H  | -0.982832000 | -3.806712000 | 0.112168000  |
| H  | 0.080653000  | -3.068343000 | -1.086977000 |
| H  | 0.458503000  | -2.922842000 | 0.628761000  |
| C  | -0.192428000 | 2.100562000  | 1.812011000  |
| H  | -0.842952000 | 1.559752000  | 2.504640000  |

|    |              |              |              |
|----|--------------|--------------|--------------|
| H  | 0.841943000  | 1.833222000  | 2.046309000  |
| H  | -0.317947000 | 3.170870000  | 1.996722000  |
| C  | -2.350575000 | 2.156604000  | -0.385451000 |
| H  | -2.491142000 | 3.227194000  | -0.210856000 |
| H  | -2.583768000 | 1.953210000  | -1.434106000 |
| H  | -3.082606000 | 1.625569000  | 0.229083000  |
| C  | 0.595062000  | 2.606234000  | -1.097781000 |
| H  | 0.378862000  | 2.458809000  | -2.166043000 |
| H  | 0.512728000  | 3.683398000  | -0.932575000 |
| H  | 1.642956000  | 2.345358000  | -0.903907000 |
| C  | 2.318077000  | -0.507754000 | 0.218288000  |
| H  | 0.853514000  | -0.320212000 | 0.175979000  |
| F  | 2.979507000  | -1.654005000 | 0.421486000  |
| F  | 2.534170000  | -0.288788000 | -1.247629000 |
| F  | 3.097398000  | 0.461792000  | 0.740201000  |
| Li | 0.891226000  | 0.188987000  | -1.832492000 |

**$\eta^2$ -P1<sub>Li</sub>, -1219.04189349**

|    |              |              |              |
|----|--------------|--------------|--------------|
| N  | -0.364949000 | -0.185001000 | -0.233954000 |
| Si | -0.735005000 | 1.553946000  | -0.034112000 |
| Si | -1.552558000 | -1.497766000 | -0.163646000 |
| C  | -2.440438000 | 1.952811000  | -0.713923000 |
| H  | -3.242818000 | 1.405543000  | -0.212478000 |
| H  | -2.644846000 | 3.019830000  | -0.586001000 |
| H  | -2.495354000 | 1.732558000  | -1.783427000 |
| C  | -0.680054000 | 1.931044000  | 1.800198000  |
| H  | 0.335673000  | 1.812373000  | 2.188501000  |
| H  | -0.978876000 | 2.966436000  | 1.985607000  |
| H  | -1.356498000 | 1.289849000  | 2.371956000  |
| C  | 0.562818000  | 2.502824000  | -0.976676000 |
| H  | 0.425786000  | 3.577981000  | -0.832639000 |
| H  | 1.564587000  | 2.235485000  | -0.633631000 |
| H  | 0.500243000  | 2.301969000  | -2.049747000 |
| C  | -2.670605000 | -1.527806000 | -1.666286000 |
| H  | -3.318898000 | -0.649672000 | -1.705198000 |
| H  | -2.084690000 | -1.555412000 | -2.589035000 |
| H  | -3.308686000 | -2.415825000 | -1.652934000 |
| C  | -2.555305000 | -1.262943000 | 1.402350000  |
| H  | -3.275692000 | -2.079008000 | 1.506151000  |
| H  | -1.922868000 | -1.270621000 | 2.294734000  |
| H  | -3.120128000 | -0.327649000 | 1.400623000  |
| C  | -0.573924000 | -3.094975000 | -0.067941000 |
| H  | 0.017548000  | -3.164755000 | 0.850629000  |
| H  | -1.238973000 | -3.962402000 | -0.088212000 |

|    |             |              |              |
|----|-------------|--------------|--------------|
| H  | 0.118369000 | -3.188101000 | -0.909220000 |
| C  | 2.978996000 | -0.401002000 | 0.367483000  |
| H  | 0.268165000 | -0.308671000 | -1.027228000 |
| F  | 3.202832000 | 0.237455000  | -0.815256000 |
| F  | 2.363538000 | 0.756538000  | 1.175944000  |
| F  | 4.197947000 | -0.480003000 | 0.929116000  |
| Li | 1.131704000 | -0.592538000 | 1.064283000  |

**$\eta^2$ -LiCF<sub>3</sub>, -345.147826110**

|    |              |              |              |
|----|--------------|--------------|--------------|
| C  | 0.114690000  | 0.000055000  | 0.418789000  |
| F  | 0.800839000  | -1.061148000 | -0.030310000 |
| F  | -1.102116000 | -0.001434000 | -0.576775000 |
| F  | 0.798775000  | 1.062342000  | -0.031274000 |
| Li | -1.721877000 | 0.000608000  | 1.077497000  |

**TS[2-3]<sub>Li</sub>, -345.138534248, *i*131.2352**

|    |              |              |              |
|----|--------------|--------------|--------------|
| C  | 0.162883000  | 0.010541000  | 0.476578000  |
| F  | 1.400658000  | -0.129144000 | 0.046774000  |
| F  | -0.582037000 | -1.033003000 | -0.304285000 |
| F  | -0.343725000 | 1.137730000  | -0.284179000 |
| Li | -1.750455000 | 0.052167000  | 0.671911000  |

**$\eta^3$ -LiCF<sub>3</sub>, -345.141757456**

|    |              |              |              |
|----|--------------|--------------|--------------|
| C  | 0.398066000  | -0.000075000 | 0.616721000  |
| F  | 1.336364000  | -0.000134000 | -0.316520000 |
| F  | -0.510983000 | -1.117098000 | 0.038468000  |
| F  | -0.510624000 | 1.117195000  | 0.038494000  |
| Li | -1.740403000 | 0.000261000  | -0.514768000 |

**$\eta^3$ -C<sub>2</sub>Li, -1214.64395106**

|    |              |              |              |
|----|--------------|--------------|--------------|
| Si | -1.603648000 | -0.424576000 | 0.000540000  |
| C  | -0.909728000 | -1.146402000 | -1.559272000 |
| H  | -1.278008000 | -2.170310000 | -1.675372000 |
| H  | -1.218457000 | -0.572272000 | -2.435363000 |
| H  | 0.180695000  | -1.179455000 | -1.513625000 |
| C  | -0.909215000 | -1.143284000 | 1.561529000  |
| H  | 0.181505000  | -1.169406000 | 1.518644000  |
| H  | -1.224076000 | -0.572348000 | 2.437506000  |
| H  | -1.270831000 | -2.169842000 | 1.675267000  |
| C  | -3.462484000 | -0.310834000 | 0.000784000  |
| H  | -3.826829000 | 0.215553000  | 0.885265000  |
| H  | -3.827712000 | 0.209143000  | -0.887102000 |
| H  | -3.891391000 | -1.317116000 | 0.004696000  |
| Cl | -1.009712000 | 1.665890000  | -0.001530000 |

|    |             |              |              |
|----|-------------|--------------|--------------|
| C  | 2.291980000 | -0.627057000 | 0.001953000  |
| F  | 3.622721000 | -0.672463000 | 0.000367000  |
| F  | 2.067600000 | 0.386217000  | -1.102424000 |
| F  | 2.070295000 | 0.392013000  | 1.100789000  |
| Li | 1.294140000 | 1.587853000  | -0.003340000 |

**$\eta^3$ -TS<sub>2Li</sub>, -1214.63745119, i92.2107**

|    |              |              |              |
|----|--------------|--------------|--------------|
| Si | 1.209506000  | -0.416116000 | -0.000042000 |
| C  | 0.769950000  | -1.201692000 | 1.637399000  |
| H  | 0.168339000  | -2.097369000 | 1.467737000  |
| H  | 1.670108000  | -1.469499000 | 2.195769000  |
| H  | 0.169082000  | -0.521267000 | 2.242840000  |
| C  | 0.769722000  | -1.202146000 | -1.637204000 |
| H  | 0.168732000  | -0.521901000 | -2.242724000 |
| H  | 1.669795000  | -1.470077000 | -2.195653000 |
| H  | 0.168152000  | -2.097785000 | -1.467193000 |
| C  | 3.080992000  | -0.194246000 | -0.000190000 |
| H  | 3.427835000  | 0.343484000  | -0.885694000 |
| H  | 3.427927000  | 0.343807000  | 0.885083000  |
| H  | 3.556777000  | -1.181199000 | -0.000032000 |
| Cl | 0.760464000  | 1.752205000  | -0.000314000 |
| C  | -1.536433000 | -0.381630000 | 0.000140000  |
| F  | -2.464773000 | -1.337012000 | 0.000319000  |
| F  | -2.005414000 | 0.494681000  | 1.088742000  |
| F  | -2.005652000 | 0.494490000  | -1.088498000 |
| Li | -1.503525000 | 1.906265000  | -0.000052000 |

**P<sub>2Li</sub>, -1214.68415338**

|    |              |              |              |
|----|--------------|--------------|--------------|
| Si | 1.258155000  | -0.726251000 | -0.042050000 |
| C  | 2.416420000  | -0.721466000 | -1.505951000 |
| H  | 3.170608000  | 0.063225000  | -1.416146000 |
| H  | 2.934877000  | -1.680882000 | -1.577732000 |
| H  | 1.871039000  | -0.569719000 | -2.440343000 |
| C  | 2.142549000  | -0.695649000 | 1.599358000  |
| H  | 1.430158000  | -0.606931000 | 2.422428000  |
| H  | 2.704205000  | -1.622169000 | 1.742242000  |
| H  | 2.847413000  | 0.136683000  | 1.660254000  |
| C  | -0.102603000 | -1.981601000 | -0.155378000 |
| H  | -0.856410000 | -1.846621000 | 0.624325000  |
| H  | -0.624176000 | -1.921103000 | -1.113381000 |
| H  | 0.318408000  | -2.986683000 | -0.061221000 |
| Cl | -3.353935000 | -0.504320000 | 0.570974000  |
| C  | 0.404346000  | 1.031757000  | -0.129566000 |
| F  | 1.244246000  | 2.051830000  | -0.311134000 |

|    |              |             |              |
|----|--------------|-------------|--------------|
| F  | -0.545468000 | 1.142919000 | -1.121095000 |
| F  | -0.324766000 | 1.342442000 | 0.998739000  |
| Li | -2.199863000 | 1.152800000 | 0.175630000  |

**LiCl, -467.794756581**

|    |             |             |              |
|----|-------------|-------------|--------------|
| Cl | 0.000000000 | 0.000000000 | 0.303030000  |
| Li | 0.000000000 | 0.000000000 | -1.717170000 |

**Li<sup>+</sup>, -7.28119827131**

|    |             |             |             |
|----|-------------|-------------|-------------|
| Li | 0.000000000 | 0.000000000 | 0.000000000 |
|----|-------------|-------------|-------------|

**LiF, -107.419975174**

|    |             |             |              |
|----|-------------|-------------|--------------|
| F  | 0.000000000 | 0.000000000 | -1.064739000 |
| Na | 0.000000000 | 0.000000000 | 0.871150000  |

**C, -2342.69040054**

|    |              |              |              |
|----|--------------|--------------|--------------|
| Si | -2.770456000 | 0.392314000  | -0.487330000 |
| C  | -4.606725000 | 0.401025000  | -0.811039000 |
| H  | -5.176676000 | 0.420203000  | 0.120103000  |
| H  | -4.879512000 | 1.282506000  | -1.398441000 |
| H  | -4.903361000 | -0.485510000 | -1.375686000 |
| C  | -2.255059000 | 1.804931000  | 0.621495000  |
| H  | -2.740868000 | 1.749820000  | 1.599373000  |
| H  | -1.168677000 | 1.805314000  | 0.737141000  |
| H  | -2.525645000 | 2.763145000  | 0.168300000  |
| C  | -1.738923000 | 0.280666000  | -2.018471000 |
| H  | -0.685448000 | 0.209383000  | -1.731185000 |
| H  | -2.006589000 | -0.585681000 | -2.626967000 |
| H  | -1.879498000 | 1.185049000  | -2.619279000 |
| Cl | -2.439699000 | -1.359141000 | 0.682699000  |
| N  | 1.135483000  | 0.008942000  | 0.023713000  |
| Si | 1.769516000  | 1.557357000  | -0.128350000 |
| Si | 1.571686000  | -1.548789000 | -0.444039000 |
| C  | 3.609708000  | 1.676555000  | -0.552537000 |
| H  | 3.812669000  | 1.274329000  | -1.548953000 |
| H  | 3.949626000  | 2.716914000  | -0.539079000 |
| H  | 4.218142000  | 1.111998000  | 0.159325000  |
| C  | 0.877962000  | 2.648591000  | -1.399165000 |
| H  | -0.190592000 | 2.746495000  | -1.186307000 |
| H  | 1.305984000  | 3.655478000  | -1.427898000 |
| H  | 0.972785000  | 2.217006000  | -2.400682000 |
| C  | 1.596767000  | 2.486494000  | 1.541423000  |
| H  | 2.000251000  | 3.500747000  | 1.466063000  |



|   |              |              |              |
|---|--------------|--------------|--------------|
| H | 0.559630000  | 2.600410000  | 1.881361000  |
| H | 2.167819000  | 1.981111000  | 2.330276000  |
| C | 3.390861000  | -1.787089000 | -0.908759000 |
| H | 3.653054000  | -1.199526000 | -1.793025000 |
| H | 4.053858000  | -1.472544000 | -0.097861000 |
| H | 3.603198000  | -2.837359000 | -1.131891000 |
| C | 0.554049000  | -2.284379000 | -1.860229000 |
| H | 0.905450000  | -3.291440000 | -2.105677000 |
| H | -0.501728000 | -2.356527000 | -1.581716000 |
| H | 0.622010000  | -1.674828000 | -2.766058000 |
| C | 1.261738000  | -2.773453000 | 1.000804000  |
| H | 0.197858000  | -2.850495000 | 1.259305000  |
| H | 1.572563000  | -3.781380000 | 0.711189000  |
| H | 1.838775000  | -2.519707000 | 1.899490000  |
| K | 0.032565000  | -0.287078000 | 2.283254000  |

**TS, -2342.66980081, *i*108.1951**

|    |              |              |              |
|----|--------------|--------------|--------------|
| Si | 1.738279000  | -0.635306000 | -0.555117000 |
| C  | 3.616547000  | -0.835204000 | -0.924075000 |
| H  | 4.206063000  | -0.999099000 | -0.018446000 |
| H  | 3.781616000  | -1.684018000 | -1.598016000 |
| H  | 4.018901000  | 0.055431000  | -1.416055000 |
| C  | 1.569395000  | -2.165285000 | 0.550191000  |
| H  | 2.261789000  | -2.030174000 | 1.388485000  |
| H  | 0.586321000  | -2.433915000 | 0.926219000  |
| H  | 1.948598000  | -3.024729000 | -0.012052000 |
| C  | 1.213079000  | -0.564714000 | -2.370968000 |
| H  | 0.161228000  | -0.375035000 | -2.559890000 |
| H  | 1.816925000  | 0.193585000  | -2.876727000 |
| H  | 1.493584000  | -1.530705000 | -2.807925000 |
| Cl | 2.256385000  | 1.036424000  | 0.851003000  |
| N  | -0.455516000 | 0.022847000  | -0.101044000 |
| Si | -1.615666000 | -1.245337000 | -0.177957000 |
| Si | -0.777841000 | 1.690693000  | -0.434878000 |
| C  | -3.387546000 | -0.831716000 | -0.693567000 |
| H  | -3.462011000 | -0.420892000 | -1.701229000 |
| H  | -3.953505000 | -1.768991000 | -0.677056000 |
| H  | -3.881896000 | -0.139833000 | -0.008150000 |
| C  | -1.155054000 | -2.674464000 | -1.328683000 |
| H  | -0.157073000 | -3.089560000 | -1.187619000 |
| H  | -1.876199000 | -3.486603000 | -1.192209000 |
| H  | -1.230761000 | -2.345547000 | -2.369124000 |
| C  | -1.955294000 | -2.002936000 | 1.560921000  |
| H  | -2.687819000 | -2.807049000 | 1.442965000  |

|   |              |              |              |
|---|--------------|--------------|--------------|
| H | -1.110158000 | -2.450320000 | 2.093955000  |
| H | -2.435874000 | -1.263830000 | 2.216494000  |
| C | -2.434808000 | 2.115647000  | -1.246031000 |
| H | -2.565336000 | 1.610209000  | -2.206121000 |
| H | -3.310198000 | 1.907295000  | -0.629958000 |
| H | -2.421995000 | 3.192124000  | -1.446822000 |
| C | 0.443861000  | 2.525457000  | -1.610923000 |
| H | 0.251494000  | 3.603244000  | -1.589068000 |
| H | 1.497293000  | 2.375574000  | -1.377588000 |
| H | 0.265337000  | 2.187366000  | -2.635654000 |
| C | -0.828333000 | 2.714638000  | 1.179263000  |
| H | 0.132144000  | 2.763125000  | 1.699928000  |
| H | -1.107182000 | 3.746613000  | 0.946550000  |
| H | -1.602196000 | 2.341553000  | 1.864081000  |
| K | 0.047005000  | 0.056096000  | 2.506624000  |

**(TMS)<sub>3</sub>N, -1282.50918651**

|    |              |              |              |
|----|--------------|--------------|--------------|
| N  | 0.016820000  | 0.016234000  | 0.040097000  |
| Si | -0.894730000 | -1.493879000 | 0.001340000  |
| Si | -0.882025000 | 1.531256000  | -0.057590000 |
| C  | -1.819786000 | -1.780495000 | 1.613235000  |
| H  | -2.615266000 | -1.059432000 | 1.799334000  |
| H  | -2.266888000 | -2.778974000 | 1.611453000  |
| H  | -1.118882000 | -1.731519000 | 2.451954000  |
| C  | -2.059645000 | -1.518042000 | -1.479460000 |
| H  | -1.467110000 | -1.494062000 | -2.399260000 |
| H  | -2.640950000 | -2.444964000 | -1.484524000 |
| H  | -2.763238000 | -0.685412000 | -1.518839000 |
| C  | 0.198443000  | -3.010133000 | -0.227576000 |
| H  | -0.440367000 | -3.882911000 | -0.057846000 |
| H  | 0.593784000  | -3.087019000 | -1.241325000 |
| H  | 1.031887000  | -3.080193000 | 0.473739000  |
| C  | -2.639766000 | 1.355171000  | 0.602226000  |
| H  | -3.233736000 | 0.545511000  | 0.179223000  |
| H  | -2.630286000 | 1.240389000  | 1.689249000  |
| H  | -3.158469000 | 2.293201000  | 0.379354000  |
| C  | -0.968298000 | 2.100083000  | -1.847388000 |
| H  | -1.489004000 | 3.057725000  | -1.937549000 |
| H  | 0.032008000  | 2.220516000  | -2.272237000 |
| H  | -1.499278000 | 1.365863000  | -2.459271000 |
| C  | -0.151073000 | 2.902819000  | 1.008988000  |
| H  | 0.587300000  | 3.512983000  | 0.488987000  |
| H  | -0.966863000 | 3.563262000  | 1.317516000  |
| H  | 0.308847000  | 2.505035000  | 1.917762000  |

|    |              |               |               |
|----|--------------|---------------|---------------|
| Si | 1. 778653000 | -0. 016996000 | 0. 051879000  |
| C  | 2. 472922000 | -1. 049866000 | -1. 368192000 |
| H  | 2. 623361000 | -2. 096537000 | -1. 102020000 |
| H  | 1. 814093000 | -1. 013163000 | -2. 240559000 |
| H  | 3. 442630000 | -0. 644316000 | -1. 669518000 |
| C  | 2. 532453000 | 1. 696239000  | -0. 162735000 |
| H  | 2. 106201000 | 2. 259581000  | -0. 996701000 |
| H  | 2. 463791000 | 2. 306864000  | 0. 737680000  |
| H  | 3. 595036000 | 1. 550112000  | -0. 379325000 |
| C  | 2. 403394000 | -0. 678663000 | 1. 698004000  |
| H  | 3. 495305000 | -0. 746180000 | 1. 701169000  |
| H  | 2. 106482000 | -0. 005939000 | 2. 507564000  |
| H  | 2. 006693000 | -1. 669326000 | 1. 931033000  |

**C1, -2220.08279093**

|    |               |               |               |
|----|---------------|---------------|---------------|
| N  | -0. 831998000 | 0. 078112000  | 0. 082182000  |
| Si | -0. 214187000 | 1. 640678000  | 0. 724109000  |
| Si | -1. 914817000 | 0. 157304000  | -1. 309434000 |
| C  | 0. 865131000  | 2. 534270000  | -0. 524658000 |
| H  | 1. 331597000  | 1. 856280000  | -1. 241943000 |
| H  | 0. 321116000  | 3. 309993000  | -1. 067301000 |
| H  | 1. 689951000  | 3. 009797000  | 0. 013909000  |
| C  | -1. 705415000 | 2. 712148000  | 1. 171447000  |
| H  | -2. 292520000 | 2. 242868000  | 1. 966533000  |
| H  | -1. 360984000 | 3. 681437000  | 1. 545148000  |
| H  | -2. 378188000 | 2. 906186000  | 0. 333483000  |
| C  | 0. 753816000  | 1. 427055000  | 2. 315174000  |
| H  | 0. 941937000  | 2. 439242000  | 2. 689375000  |
| H  | 0. 229168000  | 0. 886935000  | 3. 105873000  |
| H  | 1. 719388000  | 0. 955559000  | 2. 127151000  |
| C  | -1. 702034000 | 1. 718526000  | -2. 331399000 |
| H  | -1. 932947000 | 2. 643128000  | -1. 801933000 |
| H  | -0. 694998000 | 1. 810233000  | -2. 743854000 |
| H  | -2. 397079000 | 1. 641033000  | -3. 174111000 |
| C  | -3. 717331000 | 0. 059419000  | -0. 785788000 |
| H  | -4. 370479000 | 0. 111416000  | -1. 661658000 |
| H  | -3. 967180000 | -0. 851255000 | -0. 237886000 |
| H  | -3. 957636000 | 0. 909748000  | -0. 140730000 |
| C  | -1. 532554000 | -1. 220485000 | -2. 555730000 |
| H  | -1. 423228000 | -2. 221622000 | -2. 136489000 |
| H  | -2. 360178000 | -1. 270739000 | -3. 270014000 |
| H  | -0. 646045000 | -0. 977350000 | -3. 153040000 |
| Si | -1. 054547000 | -1. 220115000 | 1. 269080000  |
| C  | -2. 279537000 | -0. 734812000 | 2. 605896000  |

|   |              |              |              |
|---|--------------|--------------|--------------|
| H | -1.942649000 | 0.129218000  | 3.182477000  |
| H | -3.253394000 | -0.488656000 | 2.174074000  |
| H | -2.420546000 | -1.564961000 | 3.304160000  |
| C | -1.728513000 | -2.784996000 | 0.445735000  |
| H | -2.653062000 | -2.659807000 | -0.120101000 |
| H | -0.997791000 | -3.274707000 | -0.205642000 |
| H | -1.934419000 | -3.493131000 | 1.255217000  |
| C | 0.602302000  | -1.735891000 | 2.010851000  |
| H | 0.627239000  | -1.537523000 | 3.085239000  |
| H | 0.763149000  | -2.811229000 | 1.883888000  |
| H | 1.456406000  | -1.201016000 | 1.582468000  |
| C | 3.176152000  | 0.090039000  | -0.015685000 |
| F | 3.706726000  | -1.250532000 | -0.035953000 |
| F | 3.253182000  | 0.355397000  | -1.439727000 |
| F | 4.222664000  | 0.804370000  | 0.457033000  |
| K | 1.329570000  | -1.389091000 | -1.173125000 |

**TS1, -2220.07154249, i66.3969**

|    |              |              |              |
|----|--------------|--------------|--------------|
| N  | -0.529366000 | 0.106541000  | 0.074139000  |
| Si | 0.686840000  | 1.263261000  | 0.847015000  |
| Si | -1.632131000 | 0.815927000  | -1.102894000 |
| C  | 1.680355000  | 2.518335000  | -0.176751000 |
| H  | 1.929869000  | 2.202947000  | -1.188241000 |
| H  | 1.172265000  | 3.483776000  | -0.217760000 |
| H  | 2.629652000  | 2.661402000  | 0.348842000  |
| C  | -0.545429000 | 2.534640000  | 1.632392000  |
| H  | -1.278571000 | 2.093777000  | 2.312730000  |
| H  | 0.046053000  | 3.251720000  | 2.215040000  |
| H  | -1.093559000 | 3.123864000  | 0.889856000  |
| C  | 1.517777000  | 0.623538000  | 2.428521000  |
| H  | 1.102725000  | 1.102773000  | 3.319257000  |
| H  | 1.461646000  | -0.457303000 | 2.564191000  |
| H  | 2.581869000  | 0.870291000  | 2.371250000  |
| C  | -0.932656000 | 2.307475000  | -1.997204000 |
| H  | -0.809802000 | 3.185267000  | -1.363316000 |
| H  | 0.030426000  | 2.091951000  | -2.465070000 |
| H  | -1.640825000 | 2.565782000  | -2.791646000 |
| C  | -3.287274000 | 1.322768000  | -0.361898000 |
| H  | -3.944092000 | 1.715031000  | -1.144114000 |
| H  | -3.817708000 | 0.512069000  | 0.141073000  |
| H  | -3.131804000 | 2.117267000  | 0.372338000  |
| C  | -1.943390000 | -0.408127000 | -2.528415000 |
| H  | -2.216832000 | -1.423589000 | -2.235385000 |
| H  | -2.774933000 | -0.026827000 | -3.128859000 |

|    |              |              |              |
|----|--------------|--------------|--------------|
| H  | -1.083589000 | -0.439464000 | -3.208857000 |
| Si | -1.170739000 | -1.139322000 | 1.145425000  |
| C  | -1.876494000 | -0.484529000 | 2.753602000  |
| H  | -1.112642000 | 0.003510000  | 3.362456000  |
| H  | -2.678803000 | 0.235469000  | 2.574760000  |
| H  | -2.288179000 | -1.318723000 | 3.329815000  |
| C  | -2.542982000 | -2.150962000 | 0.308834000  |
| H  | -3.379617000 | -1.584160000 | -0.099871000 |
| H  | -2.165875000 | -2.805207000 | -0.484243000 |
| H  | -2.942786000 | -2.815980000 | 1.081740000  |
| C  | 0.118593000  | -2.476065000 | 1.540441000  |
| H  | 0.039359000  | -2.745164000 | 2.597820000  |
| H  | -0.080164000 | -3.398701000 | 0.981458000  |
| H  | 1.151818000  | -2.179093000 | 1.364306000  |
| C  | 2.448283000  | -0.124930000 | -0.218110000 |
| F  | 2.665466000  | -1.529178000 | -0.060396000 |
| F  | 2.337998000  | -0.086581000 | -1.649913000 |
| F  | 3.690096000  | 0.369350000  | -0.013331000 |
| K  | 0.608491000  | -1.930620000 | -1.539363000 |

**P1, -2220.07546677**

|    |              |              |              |
|----|--------------|--------------|--------------|
| N  | -0.484859000 | 0.025929000  | 0.059226000  |
| Si | 0.767058000  | 1.216948000  | 0.831568000  |
| Si | -1.622333000 | 0.755789000  | -1.065344000 |
| C  | 1.602240000  | 2.726473000  | -0.015211000 |
| H  | 1.856447000  | 2.586335000  | -1.066958000 |
| H  | 1.014925000  | 3.640226000  | 0.088406000  |
| H  | 2.550278000  | 2.877187000  | 0.513529000  |
| C  | -0.570235000 | 2.299279000  | 1.766308000  |
| H  | -1.233312000 | 1.741882000  | 2.432775000  |
| H  | -0.038844000 | 3.035559000  | 2.382312000  |
| H  | -1.204729000 | 2.878772000  | 1.085622000  |
| C  | 1.636141000  | 0.597802000  | 2.414717000  |
| H  | 2.081082000  | 1.482757000  | 2.881956000  |
| H  | 0.922808000  | 0.198302000  | 3.141620000  |
| H  | 2.432199000  | -0.134175000 | 2.265890000  |
| C  | -0.994827000 | 2.335198000  | -1.855028000 |
| H  | -0.866684000 | 3.158026000  | -1.152667000 |
| H  | -0.042591000 | 2.176895000  | -2.366612000 |
| H  | -1.731629000 | 2.642335000  | -2.604698000 |
| C  | -3.313702000 | 1.100368000  | -0.311232000 |
| H  | -3.953881000 | 1.593658000  | -1.048832000 |
| H  | -3.833258000 | 0.201066000  | 0.027625000  |
| H  | -3.213089000 | 1.769800000  | 0.546699000  |

|    |              |              |              |
|----|--------------|--------------|--------------|
| C  | -1.900077000 | -0.370602000 | -2.583495000 |
| H  | -2.160299000 | -1.410511000 | -2.369725000 |
| H  | -2.741732000 | 0.040362000  | -3.149317000 |
| H  | -1.045276000 | -0.332195000 | -3.270162000 |
| Si | -1.076278000 | -1.266352000 | 1.089835000  |
| C  | -2.015055000 | -0.741526000 | 2.628947000  |
| H  | -1.365688000 | -0.279465000 | 3.374228000  |
| H  | -2.809403000 | -0.030867000 | 2.389953000  |
| H  | -2.472622000 | -1.625391000 | 3.083952000  |
| C  | -2.281445000 | -2.396561000 | 0.138489000  |
| H  | -3.155641000 | -1.885083000 | -0.267751000 |
| H  | -1.833597000 | -2.976662000 | -0.676844000 |
| H  | -2.645595000 | -3.134634000 | 0.860417000  |
| C  | 0.281771000  | -2.462422000 | 1.628142000  |
| H  | -0.152093000 | -3.136230000 | 2.374244000  |
| H  | 0.662038000  | -3.097794000 | 0.821394000  |
| H  | 1.141478000  | -1.966744000 | 2.075863000  |
| C  | 2.226033000  | 0.120613000  | -0.323838000 |
| F  | 2.343126000  | -1.265874000 | -0.100571000 |
| F  | 1.978192000  | 0.131087000  | -1.719433000 |
| F  | 3.501106000  | 0.546592000  | -0.234297000 |
| K  | 0.519150000  | -1.951091000 | -1.726291000 |

**TS2, -2220.06239866, i82.4798**

|    |              |              |              |
|----|--------------|--------------|--------------|
| N  | -0.568350000 | 0.022405000  | 0.097345000  |
| Si | 1.534373000  | 1.007416000  | 1.019918000  |
| Si | -1.440767000 | 1.177475000  | -0.827629000 |
| C  | 3.117550000  | 2.088270000  | 1.092501000  |
| H  | 3.135638000  | 2.842749000  | 0.298470000  |
| H  | 3.145314000  | 2.624097000  | 2.045554000  |
| H  | 4.038538000  | 1.507900000  | 1.004611000  |
| C  | 0.322453000  | 2.281517000  | 1.721022000  |
| H  | -0.650625000 | 1.862647000  | 1.963317000  |
| H  | 0.789447000  | 2.650637000  | 2.640947000  |
| H  | 0.190484000  | 3.144687000  | 1.066616000  |
| C  | 1.890165000  | -0.340688000 | 2.285845000  |
| H  | 2.297253000  | 0.165269000  | 3.167024000  |
| H  | 1.029083000  | -0.923079000 | 2.606131000  |
| H  | 2.654843000  | -1.032756000 | 1.924357000  |
| C  | -0.424880000 | 2.661664000  | -1.447716000 |
| H  | 0.641205000  | 2.612049000  | -1.221286000 |
| H  | -0.511390000 | 2.740174000  | -2.535410000 |
| H  | -0.809163000 | 3.592331000  | -1.021622000 |
| C  | -2.951178000 | 1.938668000  | 0.026143000  |

|    |              |              |              |
|----|--------------|--------------|--------------|
| H  | -3.460128000 | 2.624381000  | -0.658856000 |
| H  | -3.684364000 | 1.200181000  | 0.358893000  |
| H  | -2.643523000 | 2.518887000  | 0.900827000  |
| C  | -2.119238000 | 0.391837000  | -2.441010000 |
| H  | -2.704440000 | -0.518574000 | -2.267986000 |
| H  | -2.789756000 | 1.101118000  | -2.935297000 |
| H  | -1.322684000 | 0.186362000  | -3.168182000 |
| Si | -1.366210000 | -1.094629000 | 1.113374000  |
| C  | -1.813263000 | -0.466907000 | 2.835312000  |
| H  | -0.951504000 | -0.078132000 | 3.382657000  |
| H  | -2.543930000 | 0.344465000  | 2.753525000  |
| H  | -2.266887000 | -1.262341000 | 3.434273000  |
| C  | -3.003645000 | -1.767627000 | 0.391131000  |
| H  | -3.744158000 | -0.991639000 | 0.184942000  |
| H  | -2.863017000 | -2.332080000 | -0.539803000 |
| H  | -3.449338000 | -2.466041000 | 1.107427000  |
| C  | -0.322091000 | -2.694999000 | 1.263189000  |
| H  | -0.342284000 | -3.085540000 | 2.284866000  |
| H  | -0.724999000 | -3.498281000 | 0.632810000  |
| H  | 0.728287000  | -2.535620000 | 1.006401000  |
| C  | 2.067776000  | 0.160901000  | -0.732504000 |
| F  | 2.057549000  | -1.221089000 | -0.616686000 |
| F  | 1.348306000  | 0.371981000  | -1.881527000 |
| F  | 3.333772000  | 0.439836000  | -1.090147000 |
| K  | -0.159633000 | -1.856758000 | -1.780031000 |

**P2, -2220.08192115**

|    |              |              |              |
|----|--------------|--------------|--------------|
| N  | 1.640210000  | -0.003422000 | -0.188811000 |
| Si | -2.735286000 | 0.327779000  | 1.060934000  |
| Si | 2.476852000  | -1.194043000 | 0.660151000  |
| C  | -4.287374000 | -0.291724000 | 1.895235000  |
| H  | -4.267503000 | -1.377984000 | 2.010639000  |
| H  | -4.380820000 | 0.146281000  | 2.892235000  |
| H  | -5.178598000 | -0.025201000 | 1.323124000  |
| C  | -1.169162000 | -0.211906000 | 1.898757000  |
| H  | -0.292013000 | -0.074152000 | 1.252568000  |
| H  | -1.002254000 | 0.367615000  | 2.811276000  |
| H  | -1.230177000 | -1.268350000 | 2.175464000  |
| C  | -2.824224000 | 2.141070000  | 0.627908000  |
| H  | -2.808398000 | 2.752693000  | 1.533618000  |
| H  | -1.974105000 | 2.439153000  | 0.010049000  |
| H  | -3.743306000 | 2.368915000  | 0.082302000  |
| C  | 2.395561000  | -1.053610000 | 2.547252000  |
| H  | 1.365360000  | -1.086218000 | 2.911752000  |

|    |              |              |              |
|----|--------------|--------------|--------------|
| H  | 2.953338000  | -1.857867000 | 3.037147000  |
| H  | 2.830017000  | -0.102998000 | 2.873034000  |
| C  | 4.315196000  | -1.337568000 | 0.228358000  |
| H  | 4.787004000  | -2.186332000 | 0.733420000  |
| H  | 4.455117000  | -1.464243000 | -0.849510000 |
| H  | 4.855422000  | -0.432791000 | 0.521582000  |
| C  | 1.709368000  | -2.887640000 | 0.218393000  |
| H  | 1.904187000  | -3.172445000 | -0.824084000 |
| H  | 2.129121000  | -3.688781000 | 0.833284000  |
| H  | 0.625547000  | -2.889613000 | 0.386664000  |
| Si | 1.777416000  | 1.671566000  | -0.281727000 |
| C  | 1.031082000  | 2.602587000  | 1.195265000  |
| H  | -0.036828000 | 2.397914000  | 1.311175000  |
| H  | 1.523399000  | 2.293621000  | 2.123008000  |
| H  | 1.155663000  | 3.685507000  | 1.094474000  |
| C  | 3.543525000  | 2.330116000  | -0.461319000 |
| H  | 4.120855000  | 2.134286000  | 0.447860000  |
| H  | 4.061669000  | 1.839262000  | -1.290370000 |
| H  | 3.560606000  | 3.409952000  | -0.638109000 |
| C  | 0.818345000  | 2.274390000  | -1.817113000 |
| H  | 0.822862000  | 3.365472000  | -1.896688000 |
| H  | 1.267130000  | 1.890105000  | -2.741456000 |
| H  | -0.232694000 | 1.962204000  | -1.788067000 |
| C  | -2.731341000 | -0.565901000 | -0.680945000 |
| F  | -2.097361000 | 0.170228000  | -1.649028000 |
| F  | -2.055918000 | -1.755278000 | -0.685123000 |
| F  | -3.949459000 | -0.834434000 | -1.174146000 |
| K  | 0.298663000  | -1.035875000 | -2.051237000 |

**$\eta^2$ -RbCF<sub>3</sub>, -361.663721128**

|    |              |              |              |
|----|--------------|--------------|--------------|
| C  | -1.334382000 | 0.000292000  | -0.298423000 |
| F  | -2.193469000 | -1.070129000 | -0.287371000 |
| F  | -0.886833000 | -0.005425000 | 1.114503000  |
| F  | -2.188443000 | 1.074947000  | -0.280372000 |
| Rb | 1.497973000  | 0.000100000  | -0.084603000 |

**RbF, -123.913508468**

|    |             |             |              |
|----|-------------|-------------|--------------|
| F  | 0.000000000 | 0.000000000 | -1.948959000 |
| Rb | 0.000000000 | 0.000000000 | 0.474071000  |

**$\eta^3$ -C<sub>2</sub>Rb, -1231.15922860**

|    |             |             |              |
|----|-------------|-------------|--------------|
| Si | 2.348874000 | 0.289017000 | 0.003495000  |
| C  | 1.920388000 | 1.239978000 | -1.529777000 |
| H  | 2.410397000 | 2.217949000 | -1.504533000 |



|    |              |              |              |
|----|--------------|--------------|--------------|
| H  | 2.253475000  | 0.713261000  | -2.426677000 |
| H  | 0.839871000  | 1.394860000  | -1.569020000 |
| C  | 1.685951000  | 1.006493000  | 1.583097000  |
| H  | 0.602267000  | 1.129938000  | 1.539349000  |
| H  | 1.945981000  | 0.375755000  | 2.436666000  |
| H  | 2.127460000  | 1.994420000  | 1.746503000  |
| C  | 4.171929000  | -0.094153000 | 0.120611000  |
| H  | 4.389988000  | -0.734596000 | 0.977722000  |
| H  | 4.526311000  | -0.595994000 | -0.782232000 |
| H  | 4.739174000  | 0.834031000  | 0.236752000  |
| Cl | 1.444185000  | -1.648534000 | -0.201714000 |
| C  | -1.421109000 | 1.438375000  | -0.185428000 |
| F  | -1.418764000 | 2.795554000  | -0.182053000 |
| F  | -2.701054000 | 1.145110000  | -0.772092000 |
| F  | -1.763253000 | 1.147547000  | 1.197194000  |
| Rb | -1.796368000 | -1.369969000 | 0.016411000  |

**$\eta^3$ -TS2<sub>Rb</sub>, -1231.15540752, i85.9929**

|    |              |              |              |
|----|--------------|--------------|--------------|
| Si | -2.044957000 | -0.161391000 | 0.000036000  |
| C  | -2.026070000 | 0.739323000  | 1.641232000  |
| H  | -2.003626000 | 1.818523000  | 1.476186000  |
| H  | -2.909434000 | 0.482304000  | 2.231428000  |
| H  | -1.130883000 | 0.486635000  | 2.210620000  |
| C  | -2.026088000 | 0.739393000  | -1.641122000 |
| H  | -1.130881000 | 0.486782000  | -2.210513000 |
| H  | -2.909432000 | 0.482350000  | -2.231337000 |
| H  | -2.003710000 | 1.818588000  | -1.476033000 |
| C  | -3.630802000 | -1.188720000 | 0.000017000  |
| H  | -3.699836000 | -1.825639000 | -0.885250000 |
| H  | -3.699837000 | -1.825679000 | 0.885257000  |
| H  | -4.497272000 | -0.517985000 | 0.000031000  |
| Cl | -0.648463000 | -1.824528000 | -0.000012000 |
| C  | 0.293935000  | 1.425238000  | 0.000016000  |
| F  | -0.151718000 | 2.713213000  | -0.000041000 |
| F  | 1.229685000  | 1.449606000  | 1.091506000  |
| F  | 1.229454000  | 1.449420000  | -1.091678000 |
| Rb | 2.356906000  | -0.781918000 | 0.000010000  |

**P2<sub>Rb</sub>, -1231.19754820**

|    |              |             |              |
|----|--------------|-------------|--------------|
| Si | -2.009599000 | 0.516102000 | -0.121648000 |
| C  | -2.290347000 | 0.941098000 | 1.666899000  |
| H  | -1.919101000 | 1.944532000 | 1.890466000  |
| H  | -3.362995000 | 0.924858000 | 1.880001000  |
| H  | -1.793182000 | 0.213722000 | 2.311420000  |

|    |              |              |              |
|----|--------------|--------------|--------------|
| C  | -2.778310000 | 1.809452000  | -1.243571000 |
| H  | -2.535201000 | 1.630097000  | -2.293203000 |
| H  | -3.866756000 | 1.783548000  | -1.141619000 |
| H  | -2.442533000 | 2.816567000  | -0.986217000 |
| C  | -2.476058000 | -1.201732000 | -0.659145000 |
| H  | -2.222340000 | -1.365666000 | -1.709476000 |
| H  | -1.963574000 | -1.939144000 | -0.038396000 |
| H  | -3.555333000 | -1.339377000 | -0.548347000 |
| Cl | -0.343804000 | -1.992449000 | 2.073079000  |
| C  | -0.083221000 | 0.735050000  | -0.483167000 |
| F  | 0.173827000  | 1.675364000  | -1.417031000 |
| F  | 0.659356000  | 1.111070000  | 0.603334000  |
| F  | 0.545850000  | -0.389687000 | -0.939898000 |
| Rb | 2.370292000  | -1.157890000 | 1.156871000  |

**$\eta^2$ -CsCF<sub>3</sub>, -357.716781494**

|    |              |              |              |
|----|--------------|--------------|--------------|
| C  | -1.735173000 | 0.000175000  | -0.299564000 |
| F  | -2.597493000 | -1.070938000 | -0.298816000 |
| F  | -1.312299000 | -0.004899000 | 1.119455000  |
| F  | -2.592591000 | 1.075481000  | -0.292410000 |
| Cs | 1.253318000  | 0.000039000  | -0.053758000 |

**CsF, -119.966850897**

|    |             |             |              |
|----|-------------|-------------|--------------|
| F  | 0.000000000 | 0.000000000 | -2.165100000 |
| Cs | 0.000000000 | 0.000000000 | 0.354289000  |

**$\eta^3$ -C<sub>2</sub>Cs, -1227.21219004**

|    |              |              |              |
|----|--------------|--------------|--------------|
| Si | 2.626754000  | 0.048597000  | 0.070138000  |
| C  | 2.500624000  | 1.318256000  | -1.274075000 |
| H  | 3.084792000  | 2.202023000  | -1.000014000 |
| H  | 2.887887000  | 0.930408000  | -2.218928000 |
| H  | 1.458379000  | 1.619203000  | -1.395791000 |
| C  | 1.930656000  | 0.569545000  | 1.714014000  |
| H  | 0.916454000  | 0.960907000  | 1.610833000  |
| H  | 1.934223000  | -0.266093000 | 2.418523000  |
| H  | 2.552561000  | 1.364750000  | 2.136395000  |
| C  | 4.357915000  | -0.631867000 | 0.243482000  |
| H  | 4.396275000  | -1.441802000 | 0.974922000  |
| H  | 4.724173000  | -1.015113000 | -0.711369000 |
| H  | 5.038251000  | 0.158145000  | 0.574724000  |
| Cl | 1.482558000  | -1.653914000 | -0.549990000 |
| C  | -0.831230000 | 1.799805000  | -0.196269000 |
| F  | -0.489820000 | 3.116300000  | -0.239594000 |
| F  | -2.113053000 | 1.806514000  | -0.840020000 |

|    |              |              |             |
|----|--------------|--------------|-------------|
| F  | -1.292355000 | 1.668128000  | 1.173905000 |
| Cs | -1.848396000 | -0.995076000 | 0.040128000 |

**$\eta^3$ -TS<sub>Cs</sub>, -1227.20848184, i83.8788**

|    |              |              |              |
|----|--------------|--------------|--------------|
| Si | 2.380179000  | -0.314056000 | 0.000182000  |
| C  | 2.474612000  | 0.577923000  | -1.643625000 |
| H  | 2.595467000  | 1.650704000  | -1.478716000 |
| H  | 3.315013000  | 0.206600000  | -2.235524000 |
| H  | 1.551608000  | 0.445212000  | -2.208973000 |
| C  | 2.473504000  | 0.577290000  | 1.644406000  |
| H  | 1.550898000  | 0.442398000  | 2.209911000  |
| H  | 3.314725000  | 0.207166000  | 2.235901000  |
| H  | 2.592221000  | 1.650400000  | 1.480181000  |
| C  | 3.842578000  | -1.512563000 | 0.000495000  |
| H  | 3.840771000  | -2.153537000 | 0.885566000  |
| H  | 3.841087000  | -2.153618000 | -0.884516000 |
| H  | 4.778333000  | -0.942298000 | 0.000642000  |
| Cl | 0.809932000  | -1.808997000 | -0.000805000 |
| C  | 0.258855000  | 1.530295000  | -0.000066000 |
| F  | 0.858889000  | 2.756591000  | -0.000310000 |
| F  | -0.664919000 | 1.670391000  | -1.090875000 |
| F  | -0.665046000 | 1.670899000  | 1.090550000  |
| Cs | -2.264165000 | -0.474944000 | 0.000093000  |

**P<sub>Cs</sub>, -1227.25030912**

|    |              |              |              |
|----|--------------|--------------|--------------|
| Si | -2.577919000 | 0.291380000  | 0.000266000  |
| C  | -4.134828000 | -0.759833000 | -0.000394000 |
| H  | -4.188582000 | -1.400318000 | 0.882920000  |
| H  | -5.016173000 | -0.112535000 | -0.000079000 |
| H  | -4.188400000 | -1.399108000 | -0.884604000 |
| C  | -2.432942000 | 1.252412000  | 1.585685000  |
| H  | -1.502606000 | 1.823116000  | 1.597283000  |
| H  | -3.273451000 | 1.947514000  | 1.667133000  |
| H  | -2.464664000 | 0.584231000  | 2.450082000  |
| C  | -2.433252000 | 1.253501000  | -1.584543000 |
| H  | -1.503104000 | 1.824456000  | -1.596270000 |
| H  | -2.465210000 | 0.585680000  | -2.449224000 |
| H  | -3.274081000 | 1.948303000  | -1.665343000 |
| Cl | 0.568832000  | 2.263561000  | -0.000237000 |
| C  | -1.151757000 | -1.069784000 | -0.000151000 |
| F  | -1.633658000 | -2.332609000 | -0.000073000 |
| F  | -0.315164000 | -1.018521000 | -1.078848000 |
| F  | -0.314542000 | -1.018595000 | 1.078134000  |
| Cs | 2.465162000  | -0.238026000 | 0.000035000  |

**Ph<sub>2</sub>CO, -576.535647165**

|   |              |              |              |
|---|--------------|--------------|--------------|
| C | 2.659593000  | -1.514143000 | -0.718568000 |
| C | 1.420226000  | -0.885970000 | -0.659097000 |
| C | 1.295067000  | 0.353470000  | -0.029119000 |
| C | 2.419488000  | 0.959508000  | 0.534857000  |
| C | 3.650568000  | 0.320722000  | 0.494228000  |
| C | 3.771566000  | -0.916719000 | -0.134303000 |
| H | 2.757278000  | -2.468960000 | -1.221175000 |
| H | 0.555728000  | -1.347568000 | -1.122071000 |
| H | 2.307045000  | 1.933206000  | 0.997137000  |
| H | 4.518178000  | 0.787624000  | 0.944797000  |
| H | 4.734540000  | -1.412341000 | -0.173858000 |
| C | 0.000008000  | 1.108931000  | 0.000126000  |
| C | -1.295057000 | 0.353486000  | 0.029218000  |
| C | -1.420310000 | -0.885906000 | 0.659271000  |
| C | -2.419392000 | 0.959493000  | -0.534958000 |
| C | -2.659693000 | -1.514059000 | 0.718629000  |
| H | -0.555876000 | -1.347471000 | 1.122396000  |
| C | -3.650485000 | 0.320721000  | -0.494447000 |
| H | -2.306881000 | 1.933162000  | -0.997282000 |
| C | -3.771581000 | -0.916668000 | 0.134166000  |
| H | -2.757457000 | -2.468830000 | 1.221305000  |
| H | -4.518030000 | 0.787601000  | -0.945163000 |
| H | -4.734566000 | -1.412275000 | 0.173633000  |
| O | 0.000007000  | 2.319832000  | 0.000034000  |

**$\eta^3$ -C<sub>C-Li</sub>, -921.717485323**

|   |              |              |              |
|---|--------------|--------------|--------------|
| C | 2.700906000  | -2.580536000 | 0.379009000  |
| C | 1.473255000  | -2.089147000 | -0.049246000 |
| C | 1.362242000  | -0.757875000 | -0.456009000 |
| C | 2.476287000  | 0.084356000  | -0.417162000 |
| C | 3.692307000  | -0.404741000 | 0.034527000  |
| C | 3.806212000  | -1.737618000 | 0.425607000  |
| H | 2.793091000  | -3.617110000 | 0.679400000  |
| H | 0.607742000  | -2.740447000 | -0.087650000 |
| H | 2.359989000  | 1.122044000  | -0.705314000 |
| H | 4.552445000  | 0.251360000  | 0.088611000  |
| H | 4.759937000  | -2.118577000 | 0.771839000  |
| C | 0.083099000  | -0.217409000 | -0.973861000 |
| C | -1.205893000 | -0.730566000 | -0.446796000 |
| C | -1.348306000 | -1.053894000 | 0.903845000  |
| C | -2.300616000 | -0.815194000 | -1.308542000 |
| C | -2.584723000 | -1.462825000 | 1.385400000  |

|    |              |              |              |
|----|--------------|--------------|--------------|
| H  | -0.505605000 | -0.930882000 | 1.573509000  |
| C  | -3.528121000 | -1.249630000 | -0.828045000 |
| H  | -2.172705000 | -0.551742000 | -2.352136000 |
| C  | -3.669826000 | -1.569322000 | 0.519706000  |
| H  | -2.705442000 | -1.688737000 | 2.437750000  |
| H  | -4.374651000 | -1.333437000 | -1.498703000 |
| H  | -4.631795000 | -1.895032000 | 0.898253000  |
| O  | 0.088729000  | 0.638859000  | -1.858982000 |
| C  | -0.075225000 | 2.228960000  | 0.828377000  |
| F  | -0.216698000 | 3.222132000  | 1.709662000  |
| F  | 0.773918000  | 2.923744000  | -0.214534000 |
| F  | -1.338340000 | 2.388774000  | 0.041141000  |
| Li | -0.388405000 | 2.391381000  | -1.524929000 |

**$\eta^3$ -TS<sub>C-Li</sub>, -921.713086666, i149.2793**

|    |              |              |              |
|----|--------------|--------------|--------------|
| C  | 2.626533000  | -2.426834000 | 0.532322000  |
| C  | 1.399672000  | -1.866351000 | 0.186213000  |
| C  | 1.346123000  | -0.582833000 | -0.356065000 |
| C  | 2.531071000  | 0.128905000  | -0.561165000 |
| C  | 3.748774000  | -0.425162000 | -0.202378000 |
| C  | 3.798808000  | -1.706453000 | 0.346283000  |
| H  | 2.662813000  | -3.428205000 | 0.944144000  |
| H  | 0.490188000  | -2.438722000 | 0.319762000  |
| H  | 2.476688000  | 1.123580000  | -0.985209000 |
| H  | 4.662989000  | 0.137535000  | -0.348403000 |
| H  | 4.752286000  | -2.140692000 | 0.623314000  |
| C  | 0.059187000  | 0.025588000  | -0.811549000 |
| C  | -1.239395000 | -0.556544000 | -0.342129000 |
| C  | -1.477728000 | -0.867189000 | 0.997990000  |
| C  | -2.228095000 | -0.794543000 | -1.293627000 |
| C  | -2.694855000 | -1.412417000 | 1.377073000  |
| H  | -0.715733000 | -0.642525000 | 1.736313000  |
| C  | -3.446576000 | -1.349777000 | -0.912904000 |
| H  | -2.029430000 | -0.550468000 | -2.330685000 |
| C  | -3.680486000 | -1.658328000 | 0.421110000  |
| H  | -2.883707000 | -1.636696000 | 2.420103000  |
| H  | -4.210772000 | -1.537384000 | -1.657885000 |
| H  | -4.631048000 | -2.083202000 | 0.721780000  |
| O  | 0.062089000  | 0.761456000  | -1.819282000 |
| C  | -0.031307000 | 1.912850000  | 0.682881000  |
| F  | -0.021441000 | 2.470557000  | 1.893576000  |
| F  | 0.834193000  | 2.797397000  | -0.082630000 |
| F  | -1.280836000 | 2.409673000  | 0.116811000  |
| Li | -0.376198000 | 2.493672000  | -1.541039000 |

**P<sub>C-Li</sub>, -921.757569254**

|    |              |              |              |
|----|--------------|--------------|--------------|
| C  | -2.509834000 | -1.779864000 | -1.295665000 |
| C  | -1.383173000 | -1.005814000 | -1.044883000 |
| C  | -1.254851000 | -0.322610000 | 0.164386000  |
| C  | -2.257568000 | -0.427401000 | 1.122320000  |
| C  | -3.381424000 | -1.210113000 | 0.873837000  |
| C  | -3.511960000 | -1.884743000 | -0.335184000 |
| H  | -2.601856000 | -2.308110000 | -2.237483000 |
| H  | -0.596766000 | -0.945092000 | -1.789497000 |
| H  | -2.126855000 | 0.106025000  | 2.055397000  |
| H  | -4.156706000 | -1.294403000 | 1.626922000  |
| H  | -4.387359000 | -2.493810000 | -0.528634000 |
| C  | -0.027076000 | 0.550699000  | 0.476272000  |
| C  | 1.263116000  | -0.249631000 | 0.173629000  |
| C  | 1.986416000  | -0.249725000 | -1.020083000 |
| C  | 1.706126000  | -1.062245000 | 1.221999000  |
| C  | 3.127767000  | -1.040509000 | -1.154612000 |
| H  | 1.682004000  | 0.359340000  | -1.860278000 |
| C  | 2.834865000  | -1.857140000 | 1.082751000  |
| H  | 1.140757000  | -1.053649000 | 2.146168000  |
| C  | 3.554990000  | -1.847524000 | -0.109692000 |
| H  | 3.680307000  | -1.021349000 | -2.086945000 |
| H  | 3.153582000  | -2.487404000 | 1.905148000  |
| H  | 4.439108000  | -2.464188000 | -0.220764000 |
| O  | -0.015810000 | 1.021244000  | 1.759680000  |
| C  | -0.131937000 | 1.816604000  | -0.403848000 |
| F  | -0.044531000 | 1.677001000  | -1.725402000 |
| F  | -1.238809000 | 2.509546000  | -0.157052000 |
| F  | 0.913484000  | 2.675717000  | -0.044716000 |
| Li | 1.045409000  | 2.364135000  | 1.916568000  |

**$\eta^3$ -C<sub>C-Na</sub>, -1076.44689306**

|   |             |              |              |
|---|-------------|--------------|--------------|
| C | 3.089309000 | -2.316899000 | 0.338086000  |
| C | 1.793005000 | -1.993402000 | -0.048611000 |
| C | 1.489503000 | -0.688215000 | -0.437001000 |
| C | 2.479200000 | 0.296720000  | -0.420536000 |
| C | 3.764026000 | -0.025017000 | -0.012307000 |
| C | 4.071067000 | -1.332972000 | 0.360474000  |
| H | 3.329912000 | -3.333476000 | 0.624894000  |
| H | 1.022640000 | -2.755805000 | -0.066129000 |
| H | 2.211515000 | 1.311465000  | -0.688584000 |
| H | 4.527526000 | 0.742525000  | 0.025858000  |
| H | 5.077941000 | -1.582587000 | 0.674524000  |

|    |              |              |              |
|----|--------------|--------------|--------------|
| C  | 0.133104000  | -0.329681000 | -0.924271000 |
| C  | -1.057268000 | -1.025884000 | -0.363338000 |
| C  | -1.128916000 | -1.339915000 | 0.994478000  |
| C  | -2.132359000 | -1.308293000 | -1.206396000 |
| C  | -2.276581000 | -1.933504000 | 1.502341000  |
| H  | -0.307200000 | -1.064601000 | 1.644739000  |
| C  | -3.269724000 | -1.923349000 | -0.698814000 |
| H  | -2.058198000 | -1.057092000 | -2.258558000 |
| C  | -3.342170000 | -2.231549000 | 0.656629000  |
| H  | -2.345542000 | -2.154541000 | 2.560456000  |
| H  | -4.098641000 | -2.159958000 | -1.355107000 |
| H  | -4.233981000 | -2.699615000 | 1.056798000  |
| O  | -0.004601000 | 0.497602000  | -1.820442000 |
| C  | -0.210540000 | 1.933091000  | 1.032646000  |
| F  | -0.291571000 | 2.703839000  | 2.135619000  |
| F  | 0.422388000  | 2.891860000  | 0.090541000  |
| F  | -1.581322000 | 2.087141000  | 0.502463000  |
| Na | -0.949505000 | 2.449139000  | -1.532113000 |

**$\eta^3$ -TS<sub>C-Na</sub>, -1076.44452833, i130.2175**

|   |              |              |              |
|---|--------------|--------------|--------------|
| C | 2.781616000  | -2.519024000 | 0.249682000  |
| C | 1.523317000  | -1.994283000 | -0.036911000 |
| C | 1.390805000  | -0.655922000 | -0.402779000 |
| C | 2.527628000  | 0.151462000  | -0.486485000 |
| C | 3.775966000  | -0.368302000 | -0.187012000 |
| C | 3.906077000  | -1.707796000 | 0.180746000  |
| H | 2.878551000  | -3.561978000 | 0.526643000  |
| H | 0.650029000  | -2.633754000 | 0.008101000  |
| H | 2.408823000  | 1.192269000  | -0.760417000 |
| H | 4.652054000  | 0.267776000  | -0.233266000 |
| H | 4.883702000  | -2.113935000 | 0.412792000  |
| C | 0.068778000  | -0.080384000 | -0.803495000 |
| C | -1.190785000 | -0.753301000 | -0.344331000 |
| C | -1.361190000 | -1.198883000 | 0.967580000  |
| C | -2.209649000 | -0.940751000 | -1.274971000 |
| C | -2.541566000 | -1.824177000 | 1.339855000  |
| H | -0.576712000 | -1.014551000 | 1.693150000  |
| C | -3.391419000 | -1.575934000 | -0.902490000 |
| H | -2.060914000 | -0.596872000 | -2.292071000 |
| C | -3.558252000 | -2.016534000 | 0.404379000  |
| H | -2.677292000 | -2.153625000 | 2.362988000  |
| H | -4.177818000 | -1.726388000 | -1.632797000 |
| H | -4.479287000 | -2.505764000 | 0.699131000  |
| O | 0.017818000  | 0.734009000  | -1.735219000 |

|    |              |             |              |
|----|--------------|-------------|--------------|
| C  | -0.039745000 | 1.649829000 | 0.985027000  |
| F  | 0.058085000  | 1.951217000 | 2.291621000  |
| F  | 0.752150000  | 2.703243000 | 0.372471000  |
| F  | -1.343271000 | 2.187134000 | 0.649947000  |
| Na | -0.630532000 | 2.764037000 | -1.351057000 |

**P<sub>C-Na<sub>3</sub></sub>, -1076.48734679**

|    |              |              |              |
|----|--------------|--------------|--------------|
| C  | -2.969512000 | -1.602794000 | -1.095321000 |
| C  | -1.728164000 | -0.988998000 | -0.969614000 |
| C  | -1.439686000 | -0.212690000 | 0.152879000  |
| C  | -2.397653000 | -0.061383000 | 1.149398000  |
| C  | -3.639258000 | -0.678317000 | 1.024579000  |
| C  | -3.928221000 | -1.447881000 | -0.097428000 |
| H  | -3.188266000 | -2.205797000 | -1.969116000 |
| H  | -0.978778000 | -1.124075000 | -1.743099000 |
| H  | -2.133423000 | 0.538346000  | 2.012038000  |
| H  | -4.382861000 | -0.557763000 | 1.804331000  |
| H  | -4.894891000 | -1.928685000 | -0.194983000 |
| C  | -0.082011000 | 0.489122000  | 0.346651000  |
| C  | 1.064728000  | -0.504503000 | 0.013433000  |
| C  | 1.986598000  | -0.405901000 | -1.030722000 |
| C  | 1.218031000  | -1.545768000 | 0.939783000  |
| C  | 3.035176000  | -1.324767000 | -1.141835000 |
| H  | 1.900042000  | 0.372498000  | -1.778535000 |
| C  | 2.251352000  | -2.462719000 | 0.822925000  |
| H  | 0.504354000  | -1.612762000 | 1.754020000  |
| C  | 3.170796000  | -2.352979000 | -0.221632000 |
| H  | 3.738747000  | -1.232322000 | -1.961351000 |
| H  | 2.341800000  | -3.268088000 | 1.542885000  |
| H  | 3.979219000  | -3.068329000 | -0.316037000 |
| O  | 0.091868000  | 0.991241000  | 1.594999000  |
| C  | -0.046377000 | 1.690377000  | -0.625279000 |
| F  | -0.138227000 | 1.397585000  | -1.932035000 |
| F  | -0.986748000 | 2.585194000  | -0.356506000 |
| F  | 1.158750000  | 2.358620000  | -0.485092000 |
| Na | 2.100030000  | 1.594513000  | 1.585968000  |

**$\eta^3$ -C<sub>C-K</sub>, -1514.11456033**

|   |             |              |              |
|---|-------------|--------------|--------------|
| C | 3.052143000 | -2.350298000 | 0.426150000  |
| C | 1.741782000 | -2.061598000 | 0.060152000  |
| C | 1.446673000 | -0.851948000 | -0.569587000 |
| C | 2.463816000 | 0.070494000  | -0.825469000 |
| C | 3.764255000 | -0.211916000 | -0.439513000 |
| C | 4.059816000 | -1.423829000 | 0.182584000  |



|   |              |              |              |
|---|--------------|--------------|--------------|
| H | 3.283485000  | -3.293606000 | 0.905790000  |
| H | 0.954485000  | -2.782523000 | 0.248351000  |
| H | 2.207403000  | 1.013758000  | -1.291554000 |
| H | 4.548503000  | 0.515030000  | -0.612081000 |
| H | 5.078065000  | -1.642676000 | 0.482740000  |
| C | 0.070424000  | -0.524037000 | -1.021134000 |
| C | -1.108003000 | -1.122753000 | -0.312526000 |
| C | -1.143251000 | -1.254001000 | 1.077620000  |
| C | -2.215512000 | -1.496315000 | -1.076761000 |
| C | -2.281023000 | -1.760837000 | 1.692375000  |
| H | -0.297348000 | -0.911675000 | 1.662293000  |
| C | -3.348455000 | -2.015497000 | -0.457956000 |
| H | -2.168343000 | -1.392978000 | -2.155638000 |
| C | -3.380055000 | -2.146639000 | 0.926881000  |
| H | -2.315533000 | -1.846162000 | 2.771754000  |
| H | -4.199753000 | -2.322716000 | -1.054000000 |
| H | -4.262466000 | -2.547646000 | 1.411678000  |
| O | -0.124531000 | 0.189214000  | -1.995457000 |
| C | 0.208305000  | 1.846936000  | 0.908769000  |
| F | 1.140212000  | 1.926278000  | 1.888211000  |
| F | 0.742501000  | 2.746090000  | -0.087020000 |
| F | -0.834793000 | 2.706877000  | 1.416281000  |
| K | -1.644685000 | 2.057773000  | -0.989075000 |

**$\eta^3$ -TS<sub>C-K</sub>, -1514.11341293, i100.7155**

|   |              |              |              |
|---|--------------|--------------|--------------|
| C | 3.142457000  | -2.155529000 | 0.327778000  |
| C | 1.819967000  | -1.831302000 | 0.034152000  |
| C | 1.516747000  | -0.604448000 | -0.552926000 |
| C | 2.545530000  | 0.290686000  | -0.855638000 |
| C | 3.858125000  | -0.028378000 | -0.550707000 |
| C | 4.159475000  | -1.254006000 | 0.043186000  |
| H | 3.373447000  | -3.112478000 | 0.780381000  |
| H | 1.032168000  | -2.543633000 | 0.248006000  |
| H | 2.288949000  | 1.241323000  | -1.307426000 |
| H | 4.650608000  | 0.678083000  | -0.766964000 |
| H | 5.187007000  | -1.502041000 | 0.283078000  |
| C | 0.123578000  | -0.225418000 | -0.936641000 |
| C | -1.047372000 | -0.965801000 | -0.335969000 |
| C | -1.139293000 | -1.272864000 | 1.024113000  |
| C | -2.085941000 | -1.331556000 | -1.193535000 |
| C | -2.255483000 | -1.935487000 | 1.513228000  |
| H | -0.347085000 | -0.952944000 | 1.691608000  |
| C | -3.205713000 | -1.999597000 | -0.701116000 |
| H | -1.994561000 | -1.105249000 | -2.250564000 |

|   |              |              |              |
|---|--------------|--------------|--------------|
| C | -3.291303000 | -2.300209000 | 0.652540000  |
| H | -2.327192000 | -2.157324000 | 2.571249000  |
| H | -4.002095000 | -2.291822000 | -1.375593000 |
| H | -4.161930000 | -2.815883000 | 1.040518000  |
| O | -0.078523000 | 0.489945000  | -1.920024000 |
| C | 0.153432000  | 1.535403000  | 0.942611000  |
| F | 1.060484000  | 1.438104000  | 1.940259000  |
| F | 0.520490000  | 2.740697000  | 0.287117000  |
| F | -1.018709000 | 1.989158000  | 1.630037000  |
| K | -1.784039000 | 2.084306000  | -0.880909000 |

**P<sub>C-K</sub>, -1514.15445623**

|   |              |              |              |
|---|--------------|--------------|--------------|
| C | 3.008478000  | -2.012058000 | 0.607568000  |
| C | 1.737132000  | -1.453409000 | 0.677448000  |
| C | 1.378067000  | -0.404256000 | -0.169812000 |
| C | 2.304916000  | 0.065431000  | -1.094883000 |
| C | 3.576431000  | -0.495669000 | -1.169533000 |
| C | 3.933483000  | -1.533862000 | -0.316656000 |
| H | 3.274389000  | -2.829167000 | 1.268309000  |
| H | 1.019035000  | -1.848991000 | 1.387095000  |
| H | 1.992584000  | 0.863215000  | -1.756721000 |
| H | 4.288468000  | -0.124103000 | -1.898260000 |
| H | 4.922098000  | -1.974430000 | -0.376020000 |
| C | -0.022666000 | 0.258382000  | -0.147713000 |
| C | -1.103953000 | -0.848555000 | -0.158917000 |
| C | -1.641873000 | -1.481982000 | 0.961542000  |
| C | -1.544179000 | -1.241116000 | -1.424030000 |
| C | -2.598992000 | -2.485822000 | 0.816242000  |
| H | -1.334678000 | -1.202148000 | 1.961336000  |
| C | -2.486999000 | -2.249974000 | -1.569776000 |
| H | -1.131476000 | -0.726076000 | -2.282921000 |
| C | -3.021884000 | -2.877197000 | -0.447180000 |
| H | -3.013099000 | -2.959516000 | 1.699043000  |
| H | -2.809792000 | -2.546575000 | -2.561496000 |
| H | -3.762967000 | -3.660306000 | -0.558199000 |
| O | -0.203431000 | 1.144743000  | -1.150239000 |
| C | -0.113722000 | 1.079610000  | 1.164226000  |
| F | 0.129403000  | 0.450456000  | 2.317901000  |
| F | 0.735482000  | 2.137147000  | 1.126034000  |
| F | -1.347896000 | 1.652628000  | 1.289598000  |
| K | -0.941866000 | 3.356365000  | -0.876485000 |

**$\eta^3$ -C<sub>C-Rb</sub>, -938.229133353**

|   |              |             |             |
|---|--------------|-------------|-------------|
| C | -3.933008000 | 1.523408000 | 0.134632000 |
|---|--------------|-------------|-------------|

|    |              |              |              |
|----|--------------|--------------|--------------|
| C  | -2.572666000 | 1.610048000  | -0.144968000 |
| C  | -1.891701000 | 0.495328000  | -0.632887000 |
| C  | -2.568425000 | -0.710656000 | -0.825061000 |
| C  | -3.918034000 | -0.799003000 | -0.523937000 |
| C  | -4.602387000 | 0.319429000  | -0.049762000 |
| H  | -4.465558000 | 2.392533000  | 0.501634000  |
| H  | -2.047012000 | 2.546857000  | 0.001833000  |
| H  | -2.009401000 | -1.573325000 | -1.167847000 |
| H  | -4.437340000 | -1.741631000 | -0.646433000 |
| H  | -5.658437000 | 0.248011000  | 0.183451000  |
| C  | -0.454538000 | 0.568815000  | -1.003996000 |
| C  | 0.449089000  | 1.523119000  | -0.276285000 |
| C  | 0.357323000  | 1.712197000  | 1.103999000  |
| C  | 1.446851000  | 2.174392000  | -1.004274000 |
| C  | 1.264738000  | 2.544765000  | 1.747207000  |
| H  | -0.393318000 | 1.163882000  | 1.660963000  |
| C  | 2.346529000  | 3.017592000  | -0.358653000 |
| H  | 1.496022000  | 2.023155000  | -2.077600000 |
| C  | 2.255994000  | 3.199574000  | 1.018270000  |
| H  | 1.205455000  | 2.676452000  | 2.820882000  |
| H  | 3.108458000  | 3.537835000  | -0.927291000 |
| H  | 2.957791000  | 3.851988000  | 1.524758000  |
| O  | -0.001051000 | -0.084834000 | -1.929744000 |
| C  | -0.062962000 | -1.591327000 | 1.082155000  |
| F  | -1.066324000 | -1.914914000 | 1.940701000  |
| F  | -0.067196000 | -2.724849000 | 0.189012000  |
| F  | 1.105705000  | -1.939955000 | 1.852848000  |
| Rb | 2.210845000  | -1.317721000 | -0.645354000 |

**$\eta^3$ -TS<sub>C-Rb</sub>, -938.228390601, i90.9587**

|   |              |              |              |
|---|--------------|--------------|--------------|
| C | -3.897386000 | 1.471758000  | 0.086702000  |
| C | -2.520688000 | 1.483452000  | -0.126675000 |
| C | -1.880698000 | 0.344481000  | -0.610576000 |
| C | -2.628002000 | -0.801936000 | -0.890328000 |
| C | -3.994330000 | -0.815304000 | -0.666209000 |
| C | -4.632880000 | 0.323709000  | -0.175274000 |
| H | -4.391149000 | 2.361141000  | 0.459780000  |
| H | -1.955211000 | 2.386252000  | 0.070861000  |
| H | -2.109883000 | -1.679425000 | -1.258264000 |
| H | -4.565633000 | -1.713916000 | -0.866595000 |
| H | -5.701933000 | 0.312270000  | 0.002029000  |
| C | -0.417190000 | 0.314421000  | -0.910923000 |
| C | 0.493320000  | 1.364001000  | -0.317894000 |
| C | 0.430883000  | 1.766029000  | 1.018514000  |

|    |               |               |               |
|----|---------------|---------------|---------------|
| C  | 1. 454694000  | 1. 927022000  | -1. 158366000 |
| C  | 1. 321479000  | 2. 714812000  | 1. 501779000  |
| H  | -0. 292857000 | 1. 299270000  | 1. 677046000  |
| C  | 2. 347506000  | 2. 880902000  | -0. 672589000 |
| H  | 1. 480279000  | 1. 621116000  | -2. 199065000 |
| C  | 2. 282236000  | 3. 273609000  | 0. 658950000  |
| H  | 1. 276728000  | 3. 010904000  | 2. 543157000  |
| H  | 3. 082082000  | 3. 322491000  | -1. 336221000 |
| H  | 2. 975713000  | 4. 012895000  | 1. 042786000  |
| O  | 0. 015490000  | -0. 385758000 | -1. 823919000 |
| C  | -0. 140026000 | -1. 268516000 | 1. 138316000  |
| F  | -1. 146397000 | -1. 361528000 | 2. 043096000  |
| F  | -0. 084389000 | -2. 581900000 | 0. 596258000  |
| F  | 1. 023627000  | -1. 309953000 | 1. 974086000  |
| Rb | 2. 233213000  | -1. 471274000 | -0. 549126000 |

**P<sub>C-Rb</sub>, -938.269967053**

|   |               |               |               |
|---|---------------|---------------|---------------|
| C | -3. 951893000 | 1. 150157000  | 0. 377982000  |
| C | -2. 615237000 | 0. 842427000  | 0. 608293000  |
| C | -1. 935350000 | -0. 022884000 | -0. 248555000 |
| C | -2. 600520000 | -0. 569686000 | -1. 340139000 |
| C | -3. 937553000 | -0. 260350000 | -1. 572981000 |
| C | -4. 616066000 | 0. 598621000  | -0. 714581000 |
| H | -4. 474452000 | 1. 824329000  | 1. 047013000  |
| H | -2. 097303000 | 1. 283557000  | 1. 454032000  |
| H | -2. 032289000 | -1. 226931000 | -1. 987879000 |
| H | -4. 450614000 | -0. 689776000 | -2. 426309000 |
| H | -5. 656891000 | 0. 841245000  | -0. 896630000 |
| C | -0. 449451000 | -0. 399717000 | -0. 055778000 |
| C | 0. 365158000  | 0. 898089000  | 0. 226404000  |
| C | 1. 074406000  | 1. 216037000  | 1. 385780000  |
| C | 0. 488463000  | 1. 751204000  | -0. 879002000 |
| C | 1. 903297000  | 2. 343137000  | 1. 428217000  |
| H | 0. 996166000  | 0. 598179000  | 2. 271724000  |
| C | 1. 300721000  | 2. 874626000  | -0. 835293000 |
| H | -0. 062735000 | 1. 496004000  | -1. 778275000 |
| C | 2. 024273000  | 3. 171850000  | 0. 322453000  |
| H | 2. 445117000  | 2. 571154000  | 2. 339501000  |
| H | 1. 368171000  | 3. 526447000  | -1. 699277000 |
| H | 2. 660269000  | 4. 048593000  | 0. 360921000  |
| O | 0. 084264000  | -1. 052988000 | -1. 104381000 |
| C | -0. 373991000 | -1. 343944000 | 1. 166757000  |
| F | -0. 806801000 | -0. 821601000 | 2. 332835000  |
| F | -1. 051416000 | -2. 470348000 | 0. 973788000  |

|    |             |              |              |
|----|-------------|--------------|--------------|
| F  | 0.926960000 | -1.717977000 | 1.398377000  |
| Rb | 2.674438000 | -0.925864000 | -0.848976000 |

**$\eta^3$ -C<sub>C-Cs</sub>, -934.283160425**

|    |              |              |              |
|----|--------------|--------------|--------------|
| C  | -4.336538000 | 1.100204000  | 0.171947000  |
| C  | -2.991982000 | 1.334473000  | -0.100764000 |
| C  | -2.217556000 | 0.337313000  | -0.691872000 |
| C  | -2.790566000 | -0.896303000 | -1.005842000 |
| C  | -4.124540000 | -1.132612000 | -0.718812000 |
| C  | -4.899741000 | -0.132920000 | -0.131213000 |
| H  | -4.938934000 | 1.878001000  | 0.625627000  |
| H  | -2.551978000 | 2.297018000  | 0.133334000  |
| H  | -2.162675000 | -1.663677000 | -1.442169000 |
| H  | -4.562670000 | -2.098747000 | -0.938037000 |
| H  | -5.942813000 | -0.321204000 | 0.095468000  |
| C  | -0.792101000 | 0.567811000  | -1.045503000 |
| C  | 0.003199000  | 1.596160000  | -0.288664000 |
| C  | -0.075880000 | 1.717601000  | 1.099578000  |
| C  | 0.916916000  | 2.373342000  | -1.004334000 |
| C  | 0.767410000  | 2.601152000  | 1.763581000  |
| H  | -0.758686000 | 1.081277000  | 1.650052000  |
| C  | 1.746743000  | 3.269848000  | -0.338842000 |
| H  | 0.961870000  | 2.267041000  | -2.083200000 |
| C  | 1.676360000  | 3.377609000  | 1.047949000  |
| H  | 0.722321000  | 2.674913000  | 2.843427000  |
| H  | 2.441305000  | 3.885111000  | -0.898973000 |
| H  | 2.327363000  | 4.068570000  | 1.570939000  |
| O  | -0.259426000 | -0.005708000 | -1.981394000 |
| C  | -0.238284000 | -1.469301000 | 1.101376000  |
| F  | -1.302983000 | -1.787019000 | 1.891568000  |
| F  | 0.171634000  | -2.754866000 | 0.624530000  |
| F  | 0.799067000  | -1.263640000 | 2.084119000  |
| Cs | 2.248549000  | -0.902530000 | -0.477432000 |

**$\eta^3$ -TS<sub>C-Cs</sub>, -934.282425798, i90.1315**

|   |              |              |              |
|---|--------------|--------------|--------------|
| C | -4.361348000 | 0.922262000  | -0.056009000 |
| C | -2.996193000 | 1.145082000  | -0.221593000 |
| C | -2.165564000 | 0.107873000  | -0.639819000 |
| C | -2.710236000 | -1.151395000 | -0.899638000 |
| C | -4.065206000 | -1.374534000 | -0.722391000 |
| C | -4.895330000 | -0.335793000 | -0.299869000 |
| H | -5.003913000 | 1.734101000  | 0.263517000  |
| H | -2.587420000 | 2.132343000  | -0.041970000 |
| H | -2.045841000 | -1.946322000 | -1.216644000 |

|    |              |              |              |
|----|--------------|--------------|--------------|
| H  | -4.480105000 | -2.358810000 | -0.904852000 |
| H  | -5.955709000 | -0.511609000 | -0.160824000 |
| C  | -0.707991000 | 0.311619000  | -0.901473000 |
| C  | -0.007236000 | 1.516355000  | -0.317183000 |
| C  | -0.170249000 | 1.928841000  | 1.007254000  |
| C  | 0.860911000  | 2.220739000  | -1.152444000 |
| C  | 0.534292000  | 3.024798000  | 1.486196000  |
| H  | -0.822015000 | 1.360012000  | 1.660827000  |
| C  | 1.564186000  | 3.323814000  | -0.672315000 |
| H  | 0.964483000  | 1.900463000  | -2.183887000 |
| C  | 1.403653000  | 3.724059000  | 0.649164000  |
| H  | 0.415045000  | 3.329265000  | 2.519117000  |
| H  | 2.225996000  | 3.874288000  | -1.331163000 |
| H  | 1.950759000  | 4.579445000  | 1.028299000  |
| O  | -0.140293000 | -0.320388000 | -1.789797000 |
| C  | -0.257845000 | -1.123188000 | 1.216836000  |
| F  | -1.323471000 | -1.259150000 | 2.049857000  |
| F  | 0.015971000  | -2.460154000 | 0.836485000  |
| F  | 0.816267000  | -0.908584000 | 2.136262000  |
| Cs | 2.340493000  | -1.005859000 | -0.388687000 |

**P<sub>C-Cs</sub>, -934.325219288**

|   |              |              |              |
|---|--------------|--------------|--------------|
| C | -4.359651000 | 0.929680000  | 0.056790000  |
| C | -3.025895000 | 0.762731000  | 0.412761000  |
| C | -2.214838000 | -0.124128000 | -0.295257000 |
| C | -2.746509000 | -0.833953000 | -1.365668000 |
| C | -4.080994000 | -0.665944000 | -1.724290000 |
| C | -4.890259000 | 0.214775000  | -1.013885000 |
| H | -4.984354000 | 1.620378000  | 0.611648000  |
| H | -2.612629000 | 1.328562000  | 1.241659000  |
| H | -2.080650000 | -1.504546000 | -1.896170000 |
| H | -4.490976000 | -1.222856000 | -2.559548000 |
| H | -5.929320000 | 0.346956000  | -1.293095000 |
| C | -0.726856000 | -0.354076000 | 0.049239000  |
| C | -0.036861000 | 1.026323000  | 0.251616000  |
| C | 0.554018000  | 1.511257000  | 1.418445000  |
| C | 0.109356000  | 1.775473000  | -0.924287000 |
| C | 1.294261000  | 2.698752000  | 1.402877000  |
| H | 0.451782000  | 0.977484000  | 2.354870000  |
| C | 0.833975000  | 2.957869000  | -0.940080000 |
| H | -0.350069000 | 1.392333000  | -1.829776000 |
| C | 1.442919000  | 3.422221000  | 0.228516000  |
| H | 1.745514000  | 3.056759000  | 2.321706000  |
| H | 0.921669000  | 3.525164000  | -1.860158000 |

|    |              |              |              |
|----|--------------|--------------|--------------|
| H  | 2.011248000  | 4.344989000  | 0.221380000  |
| O  | -0.056221000 | -1.061153000 | -0.878823000 |
| C  | -0.688600000 | -1.164259000 | 1.365836000  |
| F  | -1.268141000 | -0.568585000 | 2.429852000  |
| F  | -1.259255000 | -2.357744000 | 1.234963000  |
| F  | 0.606080000  | -1.401128000 | 1.745066000  |
| Cs | 2.623182000  | -0.715804000 | -0.591028000 |

---
